# Supplementary material
Source: PubMed Central journal article supplement (PMC3327726)
Supplement: NIHMS367971-supplement-1_si_001.pdf [file NIHMS367971-supplement-1_si_001.pdf]

# Site-Selective Bromination of Vancomycin

Tejas P. Pathak and Scott J. Miller\*

*Department of Chemistry, Yale University, New Haven, Connecticut, 06520*

## Contents

|                                                                                                               |     |
|---------------------------------------------------------------------------------------------------------------|-----|
| 1) General Information                                                                                        | S1  |
| 2) Procedure for Unselective Bromination of Vancomycin ( <b>4</b> ), Figure 2                                 | S2  |
| 3) Optimization of Reaction Conditions (Manuscript Table 1)                                                   | S3  |
| 4) Effect of Brominating Reagent on Product Ratio                                                             | S3  |
| 5) Procedure for Bromination of Vancomycin ( <b>4</b> ) Targeting Analog <b>6</b> ,<br>(Manuscript Figure 5)  | S6  |
| 6) LCMS Data and NMR Spectra for Analog <b>6</b>                                                              | S7  |
| 7) Procedure for Bromination of Vancomycin ( <b>4</b> ) Targeting Analog <b>8</b> ,<br>(Manuscript Figure 6)  | S12 |
| 8) LCMS Data and NMR Spectra for Analog <b>8</b>                                                              | S13 |
| 9) Procedure for Bromination of Vancomycin ( <b>4</b> ) Targeting Analog <b>17</b> ,<br>(Manuscript Figure 7) | S17 |
| 10) LCMS Data and NMR Spectra for Analog <b>17</b>                                                            | S18 |
| 11) Procedure for Bromination of Vancomycin ( <b>4</b> ) Targeting Analog <b>5</b>                            | S21 |
| 12) LCMS Data and NMR Spectra for Analog <b>5</b>                                                             | S22 |
| 13) Peptide Synthesis                                                                                         | S27 |
| 14) MIC Determination for Newly Synthesized Vancomycin Analogs                                                | S28 |
| 15) NMR Data for Peptides                                                                                     | S29 |
| 16) Synthesis of Vancomycin Methyl Ester                                                                      | S31 |
| 17) Optimization of Reaction Conditions Aiming <b>5</b> (Manuscript Table 2)                                  | S38 |
| 18) Speculative concept for bromide delivery by guanidine (Figure 8)                                          | S39 |

## General Information

Proton NMR spectra were collected on 500 MHz spectrometers at 25 °C. Proton chemical shifts are reported in ppm ( $\delta$ ) relative to the solvent reference relative to TMS employed as the internal standard (CDCl<sub>3</sub>,  $\delta$  7.26 ppm; DMSO  $\delta$  2.50 ppm; D<sub>2</sub>O,  $\delta$  4.79 ppm, CD<sub>3</sub>OD  $\delta$  3.34 ppm). Data are reported as follows: chemical shift (multiplicity [singlet (s), doublet (d), triplet (t), quartet (q), and multiplet (m)], coupling constants [Hz], integration). Infrared spectra were obtained using a FT-IR instrument utilizing a Small Orbit FT-IR ATR (Attenuated total reflectance) module. Specific rotations were determined with a Polarimeter 341 at 20 °C on the sodium D line (path length 10.0 cm). High-resolution mass spectra were obtained from institutional providers (high resolution LCMS) and the method of ionization reported herein. All solvents were either distilled or taken from a solvent purification system except H<sub>2</sub>O, in which case DI water was used as a solvent. Vancomycin•HCl was purchased from commercial supplier (95% purity by HPLC analysis at 280 nm) and was used without further purification. No precautions were taken to exclude air unless otherwise noted. MIC determinations were performed by Micromyx, LLC (Kalamazoo, MI, USA). All other reagents were purchased from commercial sources and used without further purification. *N*-bromophthalimide (NBP) was recrystallized and was kept away from light.

Note: *Vancomycin and all the reported brominated derivatives were kept in a freezer (at  $-20\text{ }^{\circ}\text{C}$ ) to avoid decomposition.*

## Procedure for Unselective Bromination of Vancomycin (4), Figure 2:

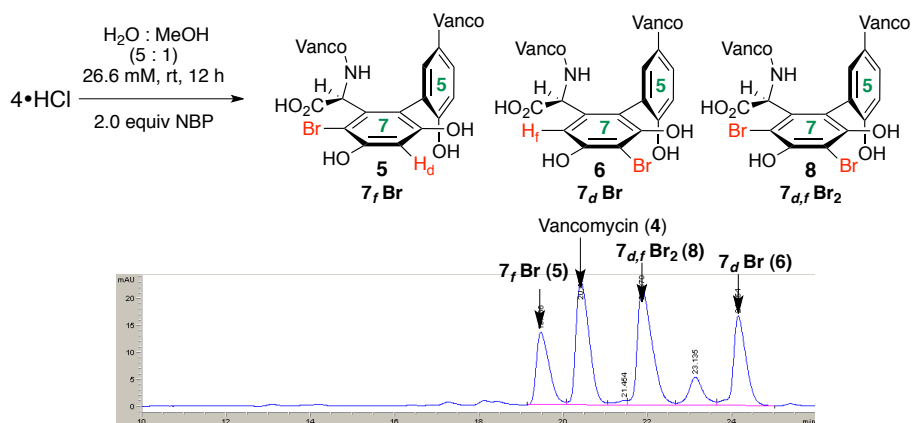

To a round-bottom flask equipped with a stir bar were added 500.0 mg (0.336 mmol, 1.0 equiv) of vancomycin•HCl (4). Water (10.0 mL) and MeOH (2.0 mL) were added to the reaction flask. The reaction mixture was allowed to stir for ca. 5 min after which 150.0 mg (0.672 mmol, 2.0 equiv) of NBP were added. The reaction mixture was stirred at room temperature. After 20 h, 10 mL of EtOAc were added and the reaction was stirred for an additional 15 min. The organic layer was discarded and the aqueous layer was diluted with 2 mL of water. The reaction was analyzed by reverse phase HPLC (see below) and was purified by preparative reverse phase HPLC (see below).

Purification of the reaction mixture yielded, 60.0 mg (11% Yield) of 7<sub>f</sub>-Br vancomycin (5), 58.0 mg (11% Yield) of 7<sub>d</sub>-Br vancomycin (6), and 131.1 mg (23% Yield) of 7<sub>d,f</sub>-Br<sub>2</sub> vancomycin (8).

Each of these isomers was characterized based on change in characteristic chemical shifts in their HSQC spectra. HSQC spectra of compound 5, 6, and 7 were recorded in both D<sub>2</sub>O and DMSO-*d*<sub>6</sub> and were compared with HSQC spectrum of native vancomycin (4). The raw spectral data are presented, including overlays with vancomycin. In the case of 7<sub>d</sub>-Br, we also observed ROESY correlation between 7<sub>f</sub>-H with X<sub>7</sub>-H indicating the presence of 7<sub>f</sub>-H, thus supporting substitution at the 7<sub>d</sub> site of resorcinol ring. A similar ROESY correlation was absent in case of compound 5.

**HPLC Method for preparative purification:** Symmetry prep C8 7 $\mu\text{m}$  (19 X 300 mm) column, 24 mL/min, starts at 5% MeCN (0.1% HCOOH) : 95% H<sub>2</sub>O (0.1% HCOOH) for 3 min, 5 to 8.5% MeCN over 15 min, 8.5 to 95% MeCN over 3 min, hold at 95% MeCN for 3 min, 95% to 5% over 3 min.

**Analytical method:** Symmetry prep C8 7 $\mu\text{m}$  column, 4 mL/min, starts at 5% MeCN (0.1% HCOOH) : H<sub>2</sub>O (0.1% HCOOH) for 3 min, 5 to 8.5% MeCN over 15 min, 8.5 to 95% MeCN over 3 min, hold at 95% MeCN for 3 min, 95% to 5% over 3 min.

## Optimization of reaction conditions (Manuscript Table 1):

| Entry | Catalyst                                              | mol% | t (h) | % conv. | 5   | 6    | 8                |
|-------|-------------------------------------------------------|------|-------|---------|-----|------|------------------|
| 1     | No catalyst                                           | NA   | 12    | 71      | 1.0 | 1.0  | 1.3 <sup>b</sup> |
| 2a    | <i>N,N</i> -dimethylacetamide                         | 100  | 12    | 68      | 1.0 | 1.0  | 1.8 <sup>b</sup> |
| 2b    | <i>N,N</i> -dimethylacetamide                         | 7100 | 16    | 64      | 1.0 | 1.5  | 2.9 <sup>b</sup> |
| 3     | Boc-Asn(Me <sub>2</sub> )-DAla-DAla-OH ( <b>10</b> )  | 100  | 2     | 97      | 1.0 | 6.8  | 2.6 <sup>b</sup> |
| 4     | Boc-DAsn(Me <sub>2</sub> )-DAla-DAla-OH ( <b>11</b> ) | 100  | 2     | 90      | 1.0 | 4.9  | 1.8 <sup>b</sup> |
| 5     | Boc-Gln(Me <sub>2</sub> )-DAla-DAla-OH ( <b>12</b> )  | 100  | 2     | 99      | 1.0 | 4.0  | 9.3 <sup>b</sup> |
| 6     | Boc-DGln(Me <sub>2</sub> )-DAla-DAla-OH ( <b>13</b> ) | 100  | 2     | 99      | 1.0 | 3.0  | 3.4 <sup>b</sup> |
| 7     | Boc-Leu-DAla-DAla-OH ( <b>14</b> )                    | 100  | 12    | 60      | 1.0 | 5.7  | 2.5 <sup>b</sup> |
| 8a    | Boc-Asn(Me <sub>2</sub> )-DAla-DAla-OH ( <b>10</b> )  | 100  | 1.5   | 98      | 1.0 | 14.6 | 2.8 <sup>c</sup> |
| 8b    |                                                       | 200  | 1.5   | 99      | 1.0 | 19.0 | 6.0 <sup>c</sup> |
| 8c    |                                                       | 50   | 2     | 97      | 1.0 | 3.4  | 1.1 <sup>c</sup> |
| 9     | Boc-Leu-DAsn(Me <sub>2</sub> )-DAla-OH ( <b>15</b> )  | 200  | 12    | 96      | 1.0 | 6.5  | 2.7 <sup>c</sup> |
| 10    | Boc-Leu-DAla-DAsn(Me <sub>2</sub> )-OH ( <b>16</b> )  | 200  | 12    | 85      | 1.0 | 3.5  | 1.0 <sup>c</sup> |
| 11    | Boc-Asn(Me <sub>2</sub> )-DAla-DAla-OH ( <b>10</b> )  | 100  | 1.5   | 16      | 1.0 | 10.5 | 0.9 <sup>d</sup> |
| 12    | Boc-Leu-DAla-DAsn(Me <sub>2</sub> )-OH ( <b>16</b> )  | 100  | 1.5   | 12      | 1.0 | 3.5  | 1.6 <sup>d</sup> |

a) Ratios were measured by HPLC at 280 nm wavelength. b) 2.0 equiv of NBP, 250  $\mu$ L of water, 50  $\mu$ L of MeOH, 8  $\mu$ mol of **4**. c) 2.0 equiv of NBP, 1000  $\mu$ L of water, 200  $\mu$ L of MeOH, 8  $\mu$ mol of **4**. d) 50 mol% NBP, 0.033 mmol of **4**.

*Note: Conversions and product ratios are uncorrected. The product ratios are highly dependent on reaction time, as each monobrominated product can be further functionalized. Thus vigorously following reaction by LC-MS, is recommended to obtain the most reproducible product distribution. Data presented in Table 1 were recorded at the indicated time. For larger scale reactions reaction progress was monitored by LCMS to obtain optimal product distribution. Conversion is defined as (100 – area % of **4**).*

**Analytical method for analysis of reaction mixture:** Symmetry prep C8 7 $\mu$ m column, 4 mL/min, starts at 5% MeCN (0.1% HCOOH) : H<sub>2</sub>O (0.1% HCOOH) for 3 min, 5 to 8.5% MeCN over 15 min, 8.5 to 95% MeCN over 3 min, hold at 95% MeCN for 3 min, 95% to 5% over 3 min.

### General Procedure for Optimization Table:

**Entry 1:** To a HPLC vial equipped with a stir bar were added 12.5 mg (0.008 mmol, 1.0 equiv) of vancomycin•HCl. Water (250  $\mu$ L) and MeOH (50  $\mu$ L) were added to the reaction flask. The reaction mixture was allowed to stir for ca. 5 min, after which 3.7 mg (0.016 mmol, 2.0 equiv) of NBP were added. Aliquots were collected at regular time intervals and analyzed by reverse phase HPLC.

**Entry 2a:** To a HPLC vial equipped with stir bar were added 12.5 mg (0.008 mmol, 1.0 equiv) of vancomycin•HCl and 250  $\mu$ L of DMA (*Standard solution was prepared as follows: 50  $\mu$ L of DMA was added to 16.8 mL of water and 250  $\mu$ L of this mixture was used as a solvent for the reaction*). To this 50  $\mu$ L of MeOH were added. The reaction mixture was allowed to stir for ca. 5 min, after which 3.7 mg (0.016 mmol, 2.0 equiv) of NBP were added. Aliquots were collected at regular time intervals and were analyzed by reverse phase HPLC.

**Entry 2b:** To a HPLC vial equipped with stir bar were added 12.5 mg (0.008 mmol, 1.0 equiv) of vancomycin•HCl, 250  $\mu$ L of H<sub>2</sub>O, 50  $\mu$ L of MeOH and 50  $\mu$ L of DMA were added. The reaction mixture was allowed to stir for ca. 5 min, after which 3.7 mg (0.016 mmol, 2.0 equiv) of NBP were added. Aliquots were collected at regular time intervals and were analyzed by reverse phase HPLC.

**Entry 3:** To a HPLC vial equipped with stir bar were added 12.5 mg (0.008 mmol, 1.0 equiv) of vancomycin•HCl and 3.2 mg (0.008 mmol, 1.0 equiv) of peptide **10**. Water (250  $\mu$ L) and MeOH (50  $\mu$ L) were added to the reaction flask. The reaction mixture was allowed to stir for ca. 5 min, after which 3.7 mg (0.016 mmol, 2.0 equiv) of NBP were added. An aliquot was collected at 120 min and analyzed by reversed phase HPLC.

**Entry 4:** The same procedure as entry 2 was employed, except peptide **11** was used.

**Entry 5:** The same procedure as entry 2 was employed, except peptide **12** was used.

**Entry 6:** The same procedure as entry 2 was employed, except peptide **13** was used.

**Entry 7:** The same procedure as entry 2 was employed, except peptide **14** was used.

**Entry 8a:** To a HPLC vial equipped with stir bar were added 12.5 mg (0.008 mmol, 1.0 equiv) of vancomycin•HCl and 3.2 mg (0.008 mmol, 1.0 equiv) of peptide **10**. Water (1000  $\mu$ L) and MeOH (250  $\mu$ L) were added to the reaction flask. The reaction mixture was allowed to stir for ca. 5 min, after which 3.7 mg (0.016 mmol, 2.0 equiv) of NBP were added. An aliquot was collected at 90 min and analyzed by reverse phase HPLC.

**Entry 8b:** To a HPLC vial equipped with stir bar were added 12.5 mg (0.008 mmol, 1.0 equiv) of vancomycin•HCl and 6.4 mg (0.016 mmol, 2.0 equiv) of peptide **10**. Water (1000  $\mu$ L) and MeOH (250  $\mu$ L) were added to the reaction flask. The reaction mixture was allowed to stir for ca. 5 min, after which 3.7 mg (0.016 mmol, 2.0 equiv) of NBP were added. An aliquot was collected at 90 min and analyzed by reverse phase HPLC.

**Entry 8c:** To a HPLC vial equipped with stir bar were added 12.5 mg (0.008 mmol, 1.0 equiv) of vancomycin•HCl and 1.6 mg (0.004 mmol, 0.5 equiv) of peptide **10**. Water (1000  $\mu$ L) and MeOH (250  $\mu$ L) were added to the reaction flask. The reaction mixture was allowed to stir for ca. 5 min, after which 3.7 mg (0.016 mmol, 2.0 equiv) of NBP were added. An aliquot was collected at 90 min and analyzed by reverse phase HPLC.

**Entry 9:** The same procedure as entry 2 was employed, except peptide **15** was used.

**Entry 10:** The same procedure as entry 2 was employed, except peptide **16** was used.

**Entry 11:** To a HPLC vial equipped with stir bar were added 49.0 mg (0.033 mmol, 1.0 equiv) of vancomycin•HCl and 13.2 mg (0.033 mmol, 1.0 equiv) of peptide **10**. Water (4000  $\mu$ L) and MeOH (800  $\mu$ L) were added to the reaction flask. The reaction mixture was allowed to stir for ca. 5 min, after which 3.7 mg (0.016 mmol, 0.5 equiv) of NBP were added. An aliquot was collected at 90 min and analyzed by reverse phase HPLC.

**Entry 12:** To a HPLC vial equipped with stir bar were added 49.0 mg (0.033 mmol, 1.0 equiv) of vancomycin•HCl and 14.9 mg (0.033 mmol, 1.0 equiv) of peptide **16**. Water (4000  $\mu$ L) and MeOH (800  $\mu$ L) were added to the reaction flask. The reaction mixture was allowed to stir for ca. 5 min, after which 3.7 mg (0.016 mmol, 0.5 equiv) of NBP were added. An aliquot was collected at 90 min and analyzed by reverse phase HPLC.

**Table 2.** Effect of Brominating Reagent on Product Ratio

| Entry | Brominating Reagent | Peptide(10) equiv | t (h) | % conv. | 5-Br : 6-Br : 8-Br |                  |
|-------|---------------------|-------------------|-------|---------|--------------------|------------------|
| 1     | NBP                 | 100 mol%          | 2     | 1.5     | 99                 | 1.0 : 14.6 : 2.8 |
| 2     | NBP                 | 25 mol%           | 2.0   | 1.5     | 83                 | 1.0 : 1.9 : 0.7  |
| 3     | NBP                 | 100 mol%          | 1.5   | 1.5     | 95                 | 1.0 : 11.0 : 1.2 |
| 4     | NBS                 | 100 mol%          | 2.0   | 1.5     | 70                 | 1.0 : 17.6 : 4.2 |
| 5     | DBDMH               | 100 mol%          | 1.0   | 1.5     | 66                 | 1.0 : 26.2 : 6.5 |

The same procedure as entry 8a (Table 1) was employed, except appropriate reagents. We selected NBP because it gives conversion of vancomycin (in 90 min) compared to other brominating reagents. Moreover, the resultant phthalimide is insoluble in water and could easily be removed *via* simple wash with EtOAc, making the purification much easier on larger scale reactions.

**Procedure for Bromination of Vancomycin (4) Targeting Analog 6 (Manuscript Figure 5):**

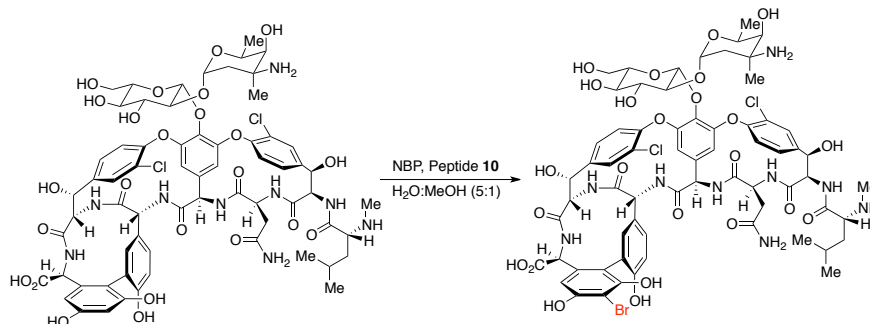

To a round bottom flask equipped with a stir bar were added 100.0 mg (0.067 mmol, 1.0 equiv) of vancomycin•HCl and 26.9 mg (0.067 mmol, 1.0 equiv) of peptide **10**. Water (8.4 mL) and MeOH (1.6 mL) were added to the reaction flask. The reaction mixture was allowed to stir for ca. 5 min after which 30.7 mg (0.135 mmol, 2.0 equiv) of NBP were added. The reaction mixture was stirred at room temperature for ca. 90 min, until complete conversion of vancomycin was observed by LC-MS (over the period of time the reaction became cloudy). To the reaction vessel, 10 mL of EtOAc was added and reaction was stirred for an additional 15 min. The organic layer was discarded and the aqueous layer was diluted with 2 mL of water. The reaction was analyzed by reverse phase HPLC and was purified by preparative reverse phase HPLC. Purification of reaction mixture yielded, 43.1 mg (41% Yield) **7<sub>d</sub>-Br vancomycin (6)**. ES-HRMS ( $M+H^+$ ): Predicted 1526.3485, observed 1526.3184.

**HPLC Method for preparative purification:** Symmetry prep C8 7 $\mu$ m (19 X 300 mm) column, 24 mL/min, starts at 5% MeCN (0.1% HCOOH) : 95% H<sub>2</sub>O (0.1% HCOOH) for 3 min, 5 to 8.5% MeCN over 15 min, 8.5 to 95% MeCN over 3 min, hold at 95% MeCN for 3 min, 95% to 5% over 3 min.

**Analytical method:** Symmetry prep C8 7 $\mu$ m column, 4 mL/min, starts at 5% MeCN (0.1% HCOOH) : H<sub>2</sub>O (0.1% HCOOH) for 3 min, 5 to 8.5% MeCN over 15 min, 8.5 to 95% MeCN over 3 min, hold at 95% MeCN for 3 min, 95% to 5% over 3 min. *Retention time of 6 on C8 column is 15.3 min.*

*HPLC trace for the reaction mixture (at 280 nm):*

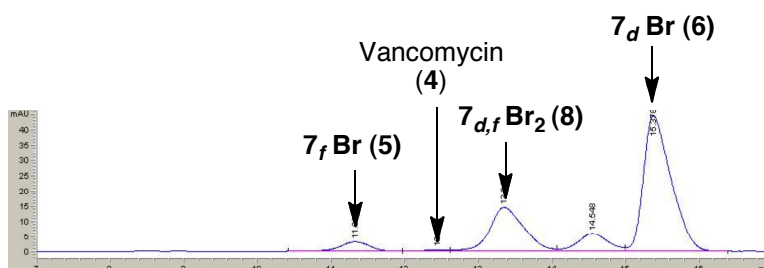

*In lieu of tabulated NMR data, please see raw spectral data provided below.*

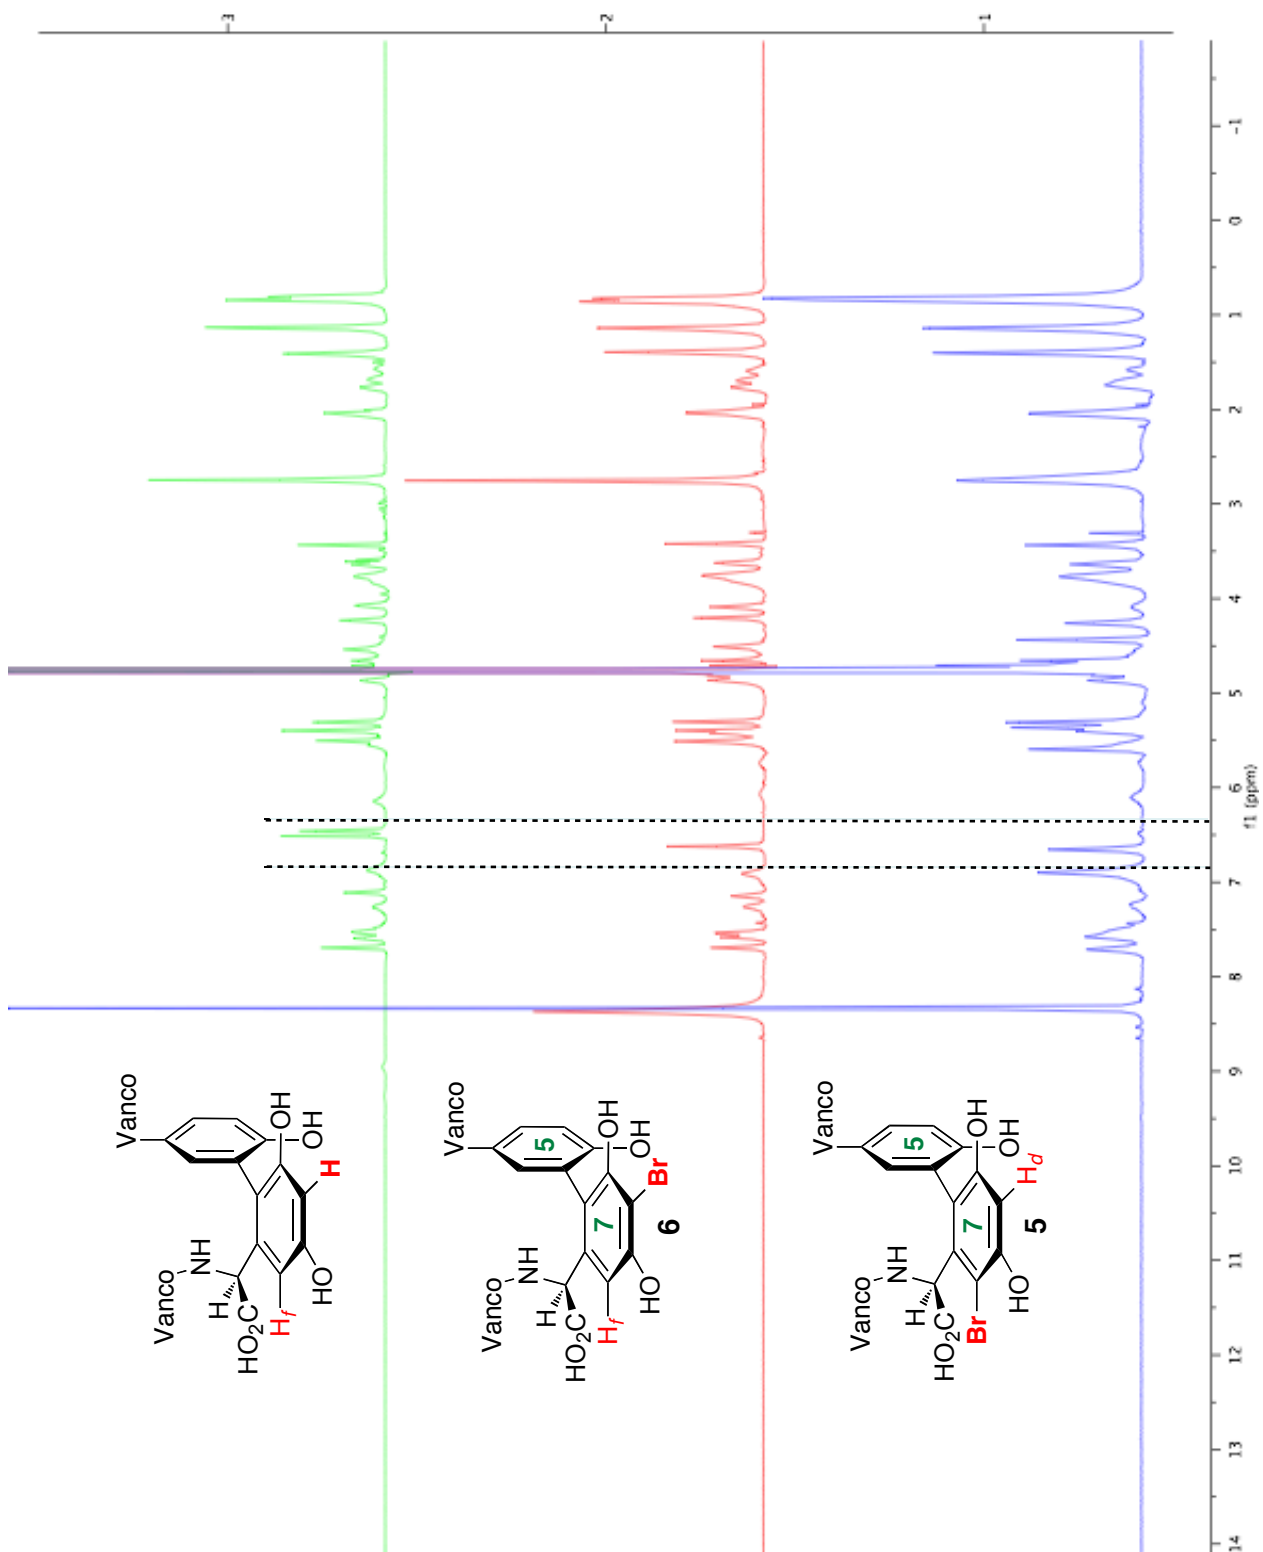

D<sub>2</sub>O, <sup>1</sup>H NMR  
7<sub>σ</sub>-Br (6)

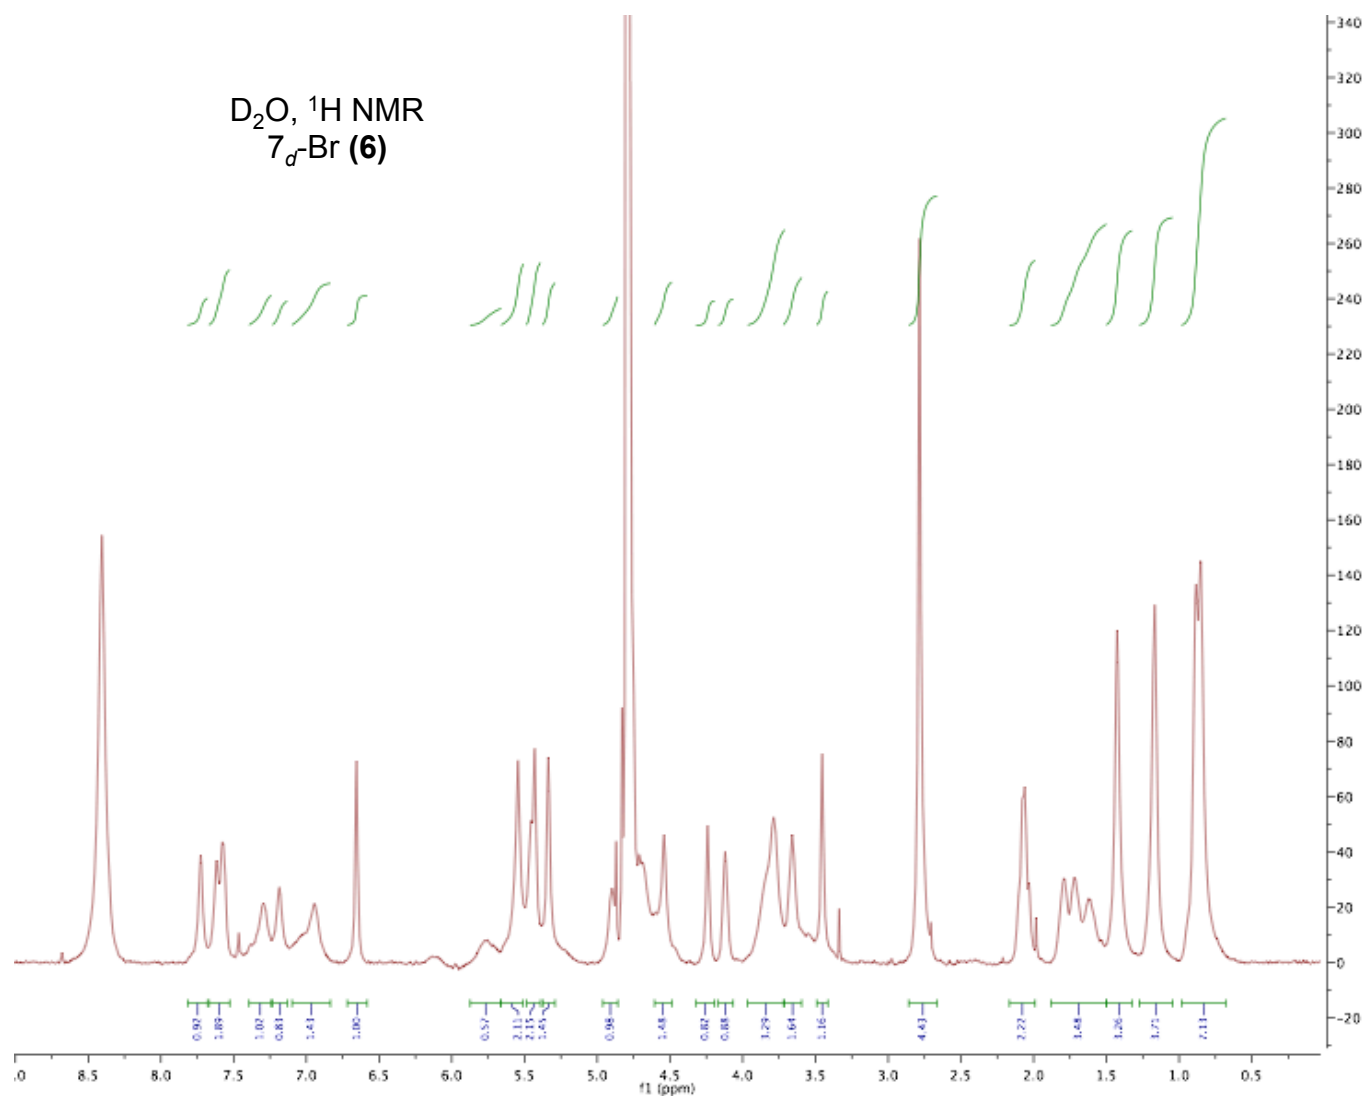



After HPLC purification  
TPP-B2P034

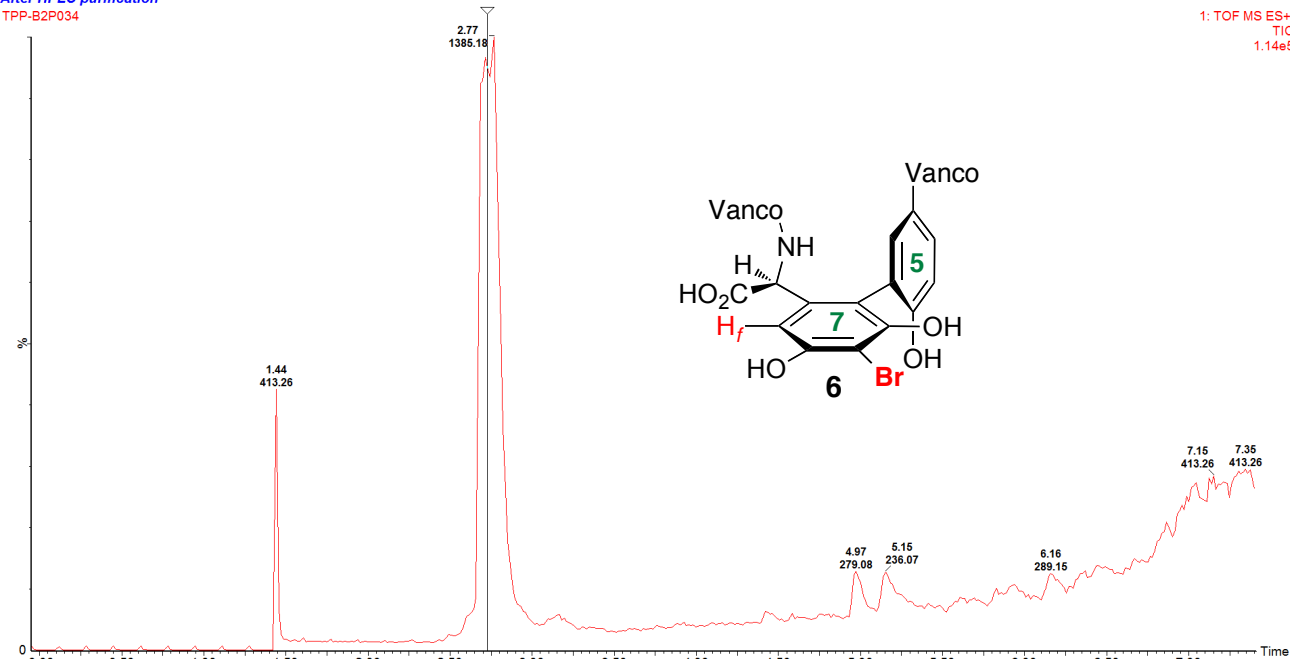

After HPLC purification  
TPP-B2P034 186 (2.808)

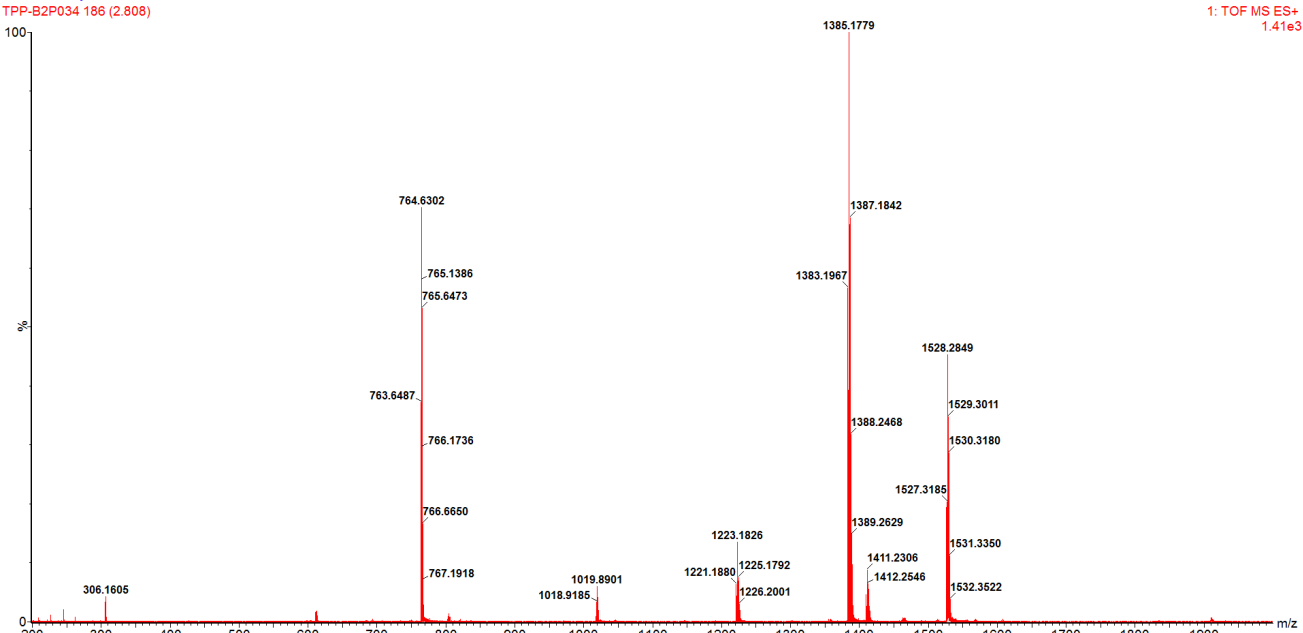

After HPLC purification

TPP-B2P034 (2.808) Cu (0.50); Is (1.00,1.00) C66H75BrCl2N9O24

1: TOF MS ES+ 2.51e12

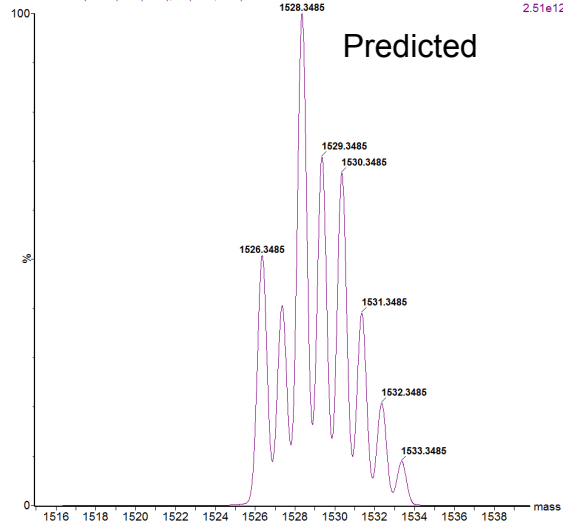

After HPLC purification

TPP-B2P034 186 (2.808)

1: TOF MS ES+ 639

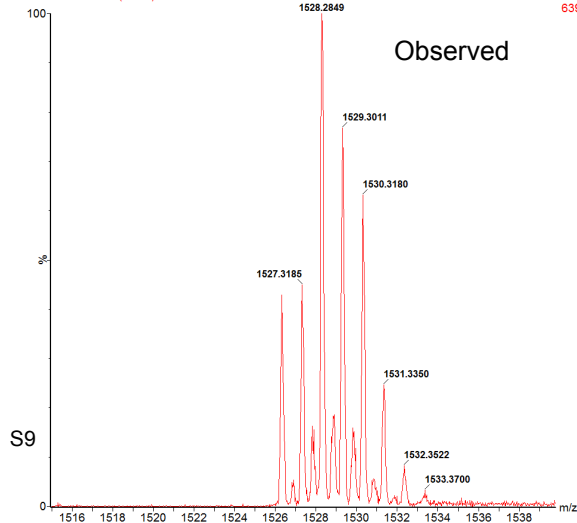

D<sub>2</sub>O, HSQC  
7<sub>d</sub>-Br (**6**)

Red = CH, CH<sub>3</sub>  
Blue = CH<sub>2</sub>

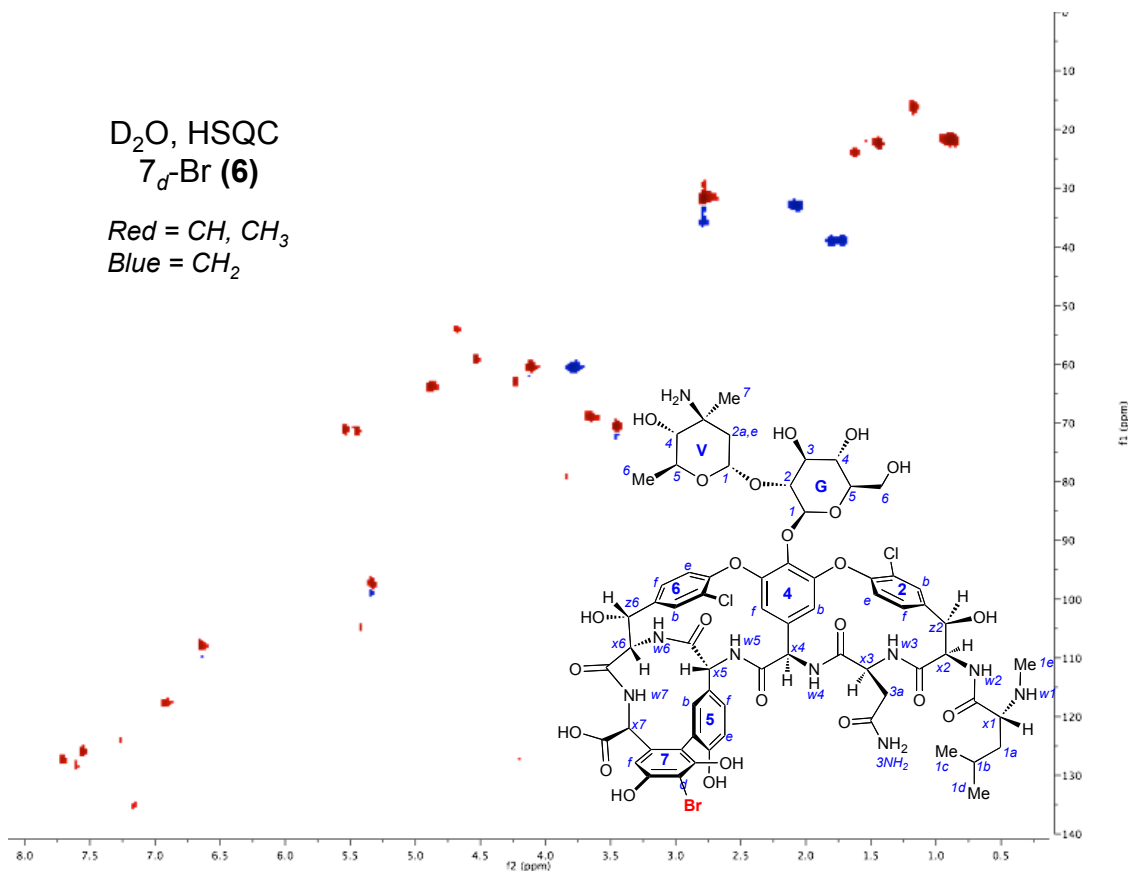

D<sub>2</sub>O, Overlay of HSQC of  
7<sub>d</sub>-Br vancomycin **6** (red)  
with vancomycin (gray)

Red = CH, CH<sub>3</sub>  
Blue = CH<sub>2</sub>

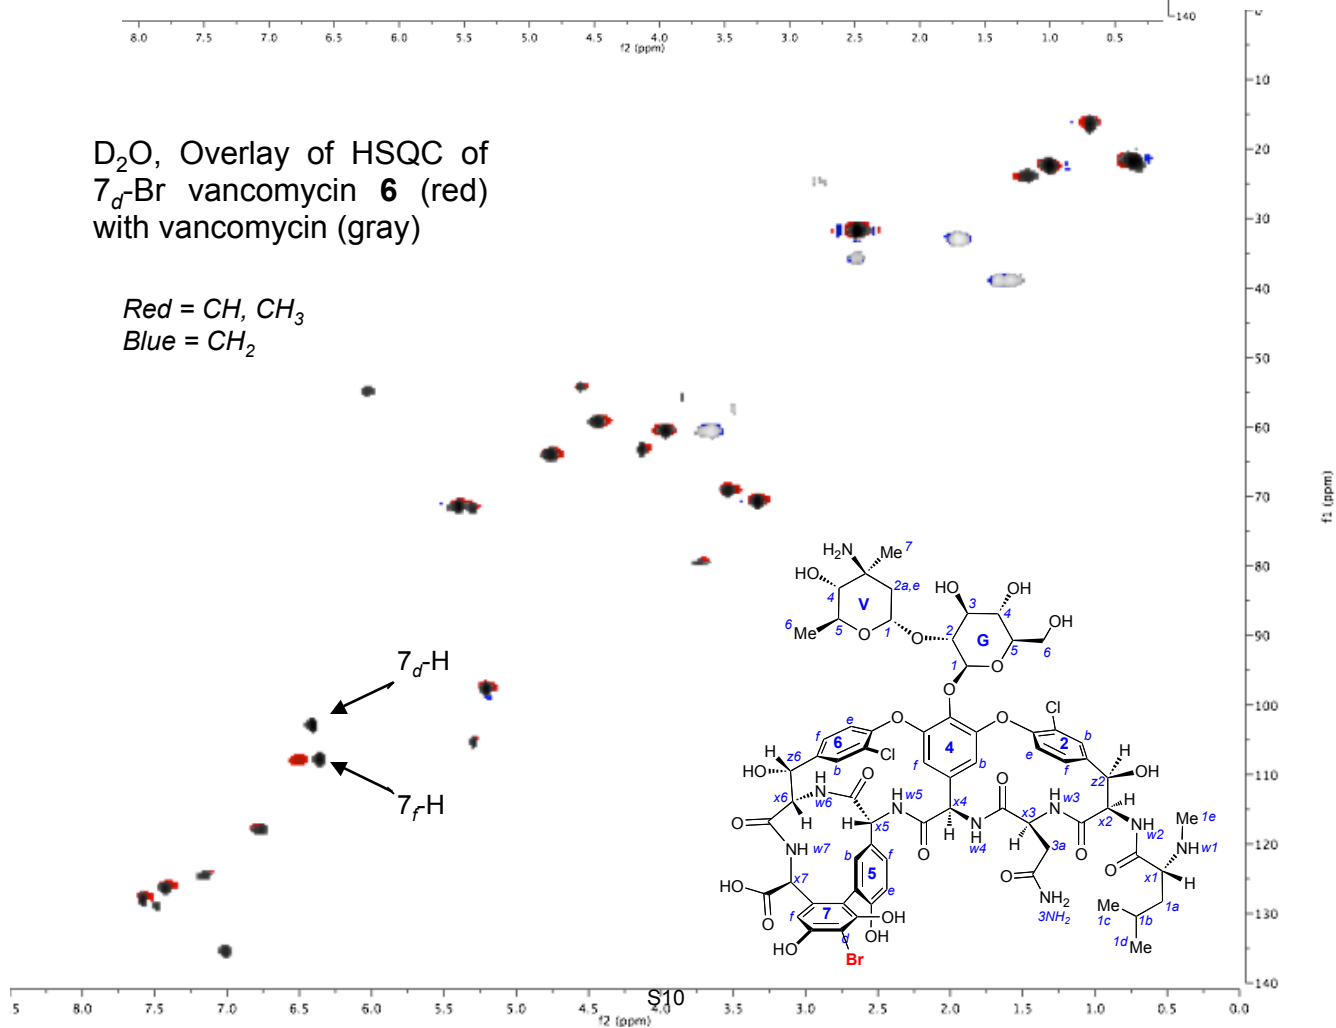

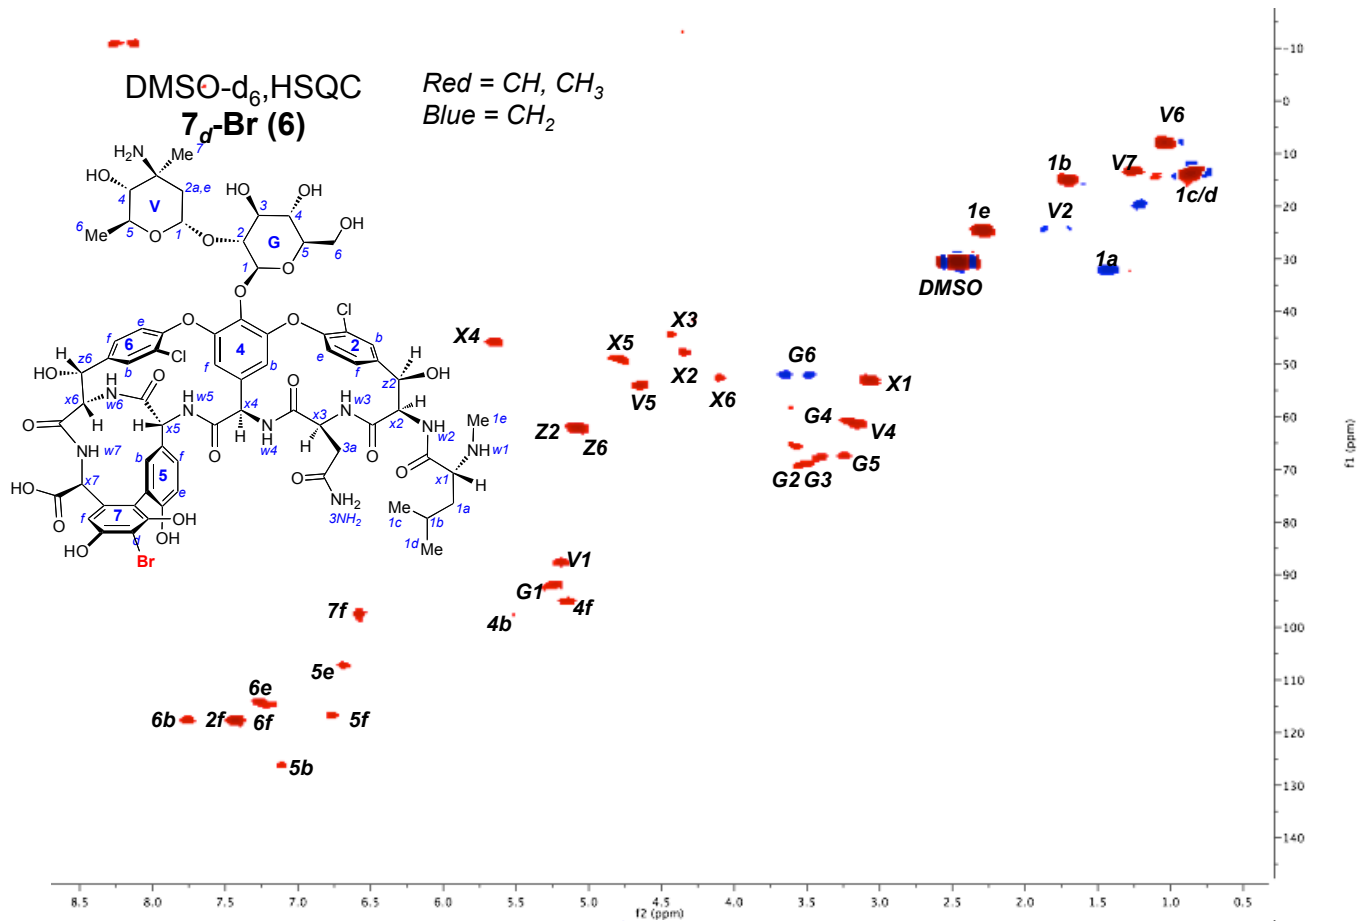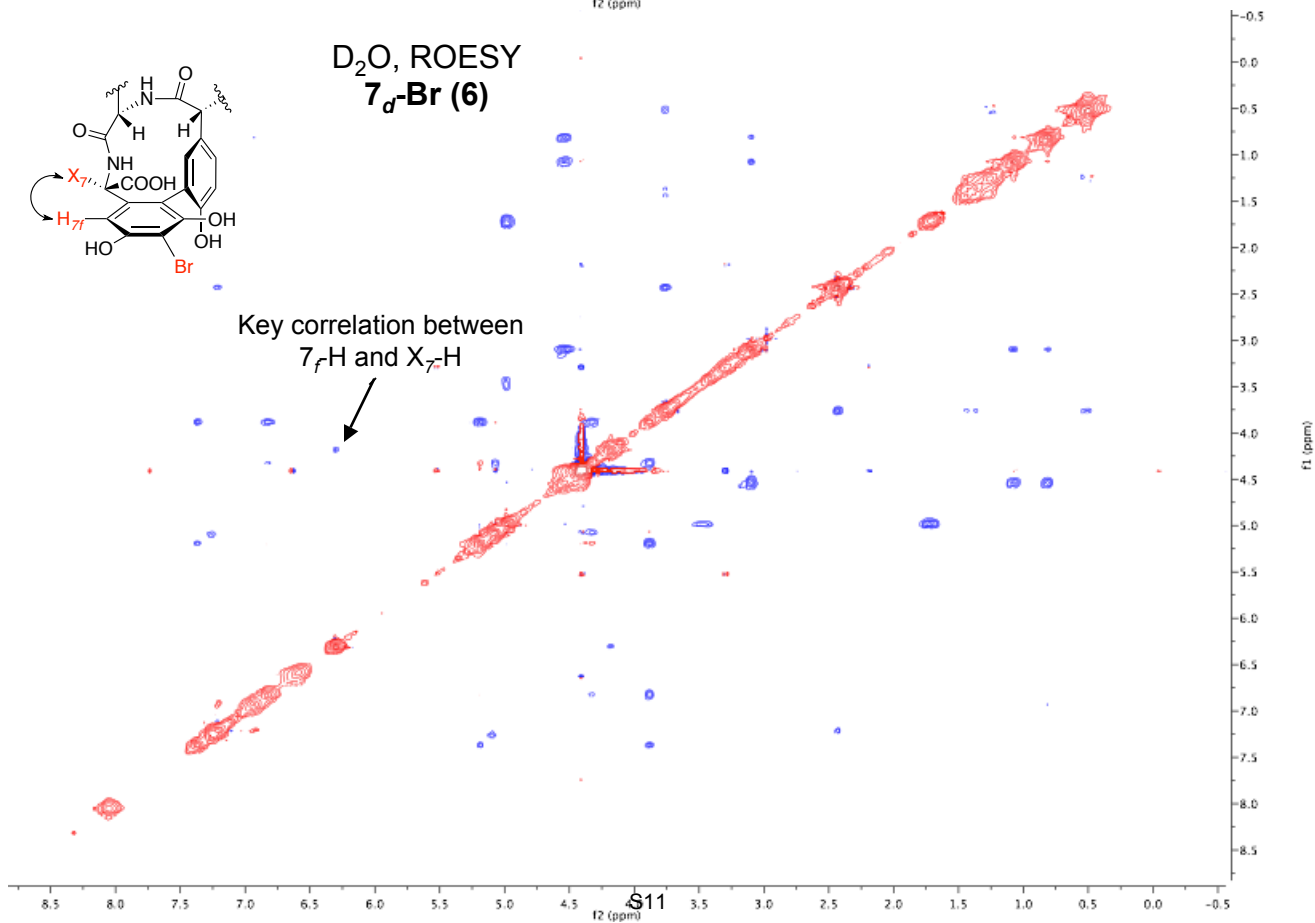

**Procedure for Dibromination of Vancomycin (4) Targeting Analog 8 (Manuscript Figure 6):**

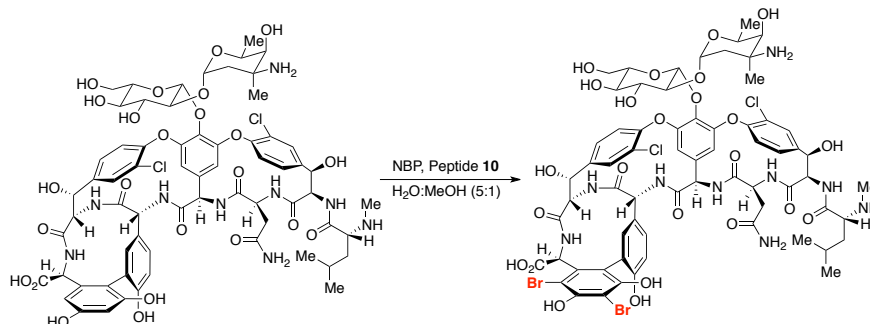

To a round bottom flask equipped with a stir bar were added 100.0 mg (0.067 mmol, 1.0 equiv) of vancomycin•HCl and 26.9 mg (0.067 mmol, 1.0 equiv) of peptide **10**. Water (2.0 mL) and MeOH (0.4 mL) were added to the reaction flask. The reaction mixture was allowed to stir for ca. 5 min, after which 45.8 mg (0.201 mmol, 3.0 equiv) of NBP were added. The reaction mixture was stirred at room temperature for ca. 60 min (over the period of time the reaction turned cloudy). To the reaction vessel, 10 mL of EtOAc was added and the reaction was stirred for an additional 15 min. The organic layer was discarded and the aqueous layer was diluted with 2 mL of water. The reaction was analyzed by reverse phase HPLC and was purified by preparative reverse phase HPLC. Purification of reaction mixture yielded 60.9 mg (55% Yield)  $7_{d,f}$ -Br<sub>2</sub> vancomycin (**8**). ES-HRMS (M+H<sup>+</sup>): Predicted 1604.2590, observed 1604.2281.

**HPLC Method for preparative purification:** Symmetry prep C8 7 $\mu$ m (19 X 300 mm) column, 24 mL/min, starts at 5% MeCN (0.1% HCOOH) : 95% H<sub>2</sub>O (0.1% HCOOH) for 3 min, 5 to 8.5% MeCN over 15 min, 8.5 to 95% MeCN over 3 min, hold at 95% MeCN for 3 min, 95% to 5% over 3 min.

**Analytical method:** Symmetry prep C8 7 $\mu$ m column, 4 mL/min, starts at 5% MeCN (0.1% HCOOH) : H<sub>2</sub>O (0.1% HCOOH) for 3 min, 5 to 8.5% MeCN over 15 min, 8.5 to 95% MeCN over 3 min, hold at 95% MeCN for 3 min, 95% to 5% over 3 min. *Retention time of 8 on C18 column is 20.1 min and retention time on C8 column is 13.3 min.*

*HPLC trace for the reaction mixture (at 280 nm):*

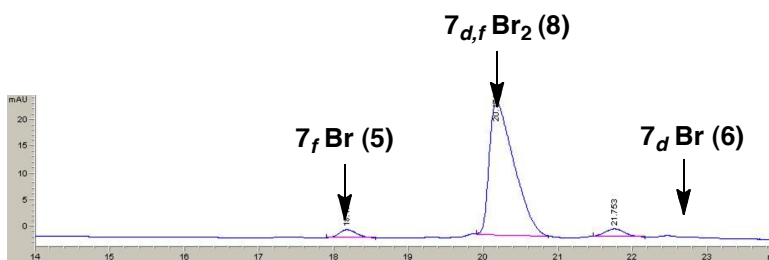

*In lieu of tabulated NMR data, please see raw spectral data provided below.*

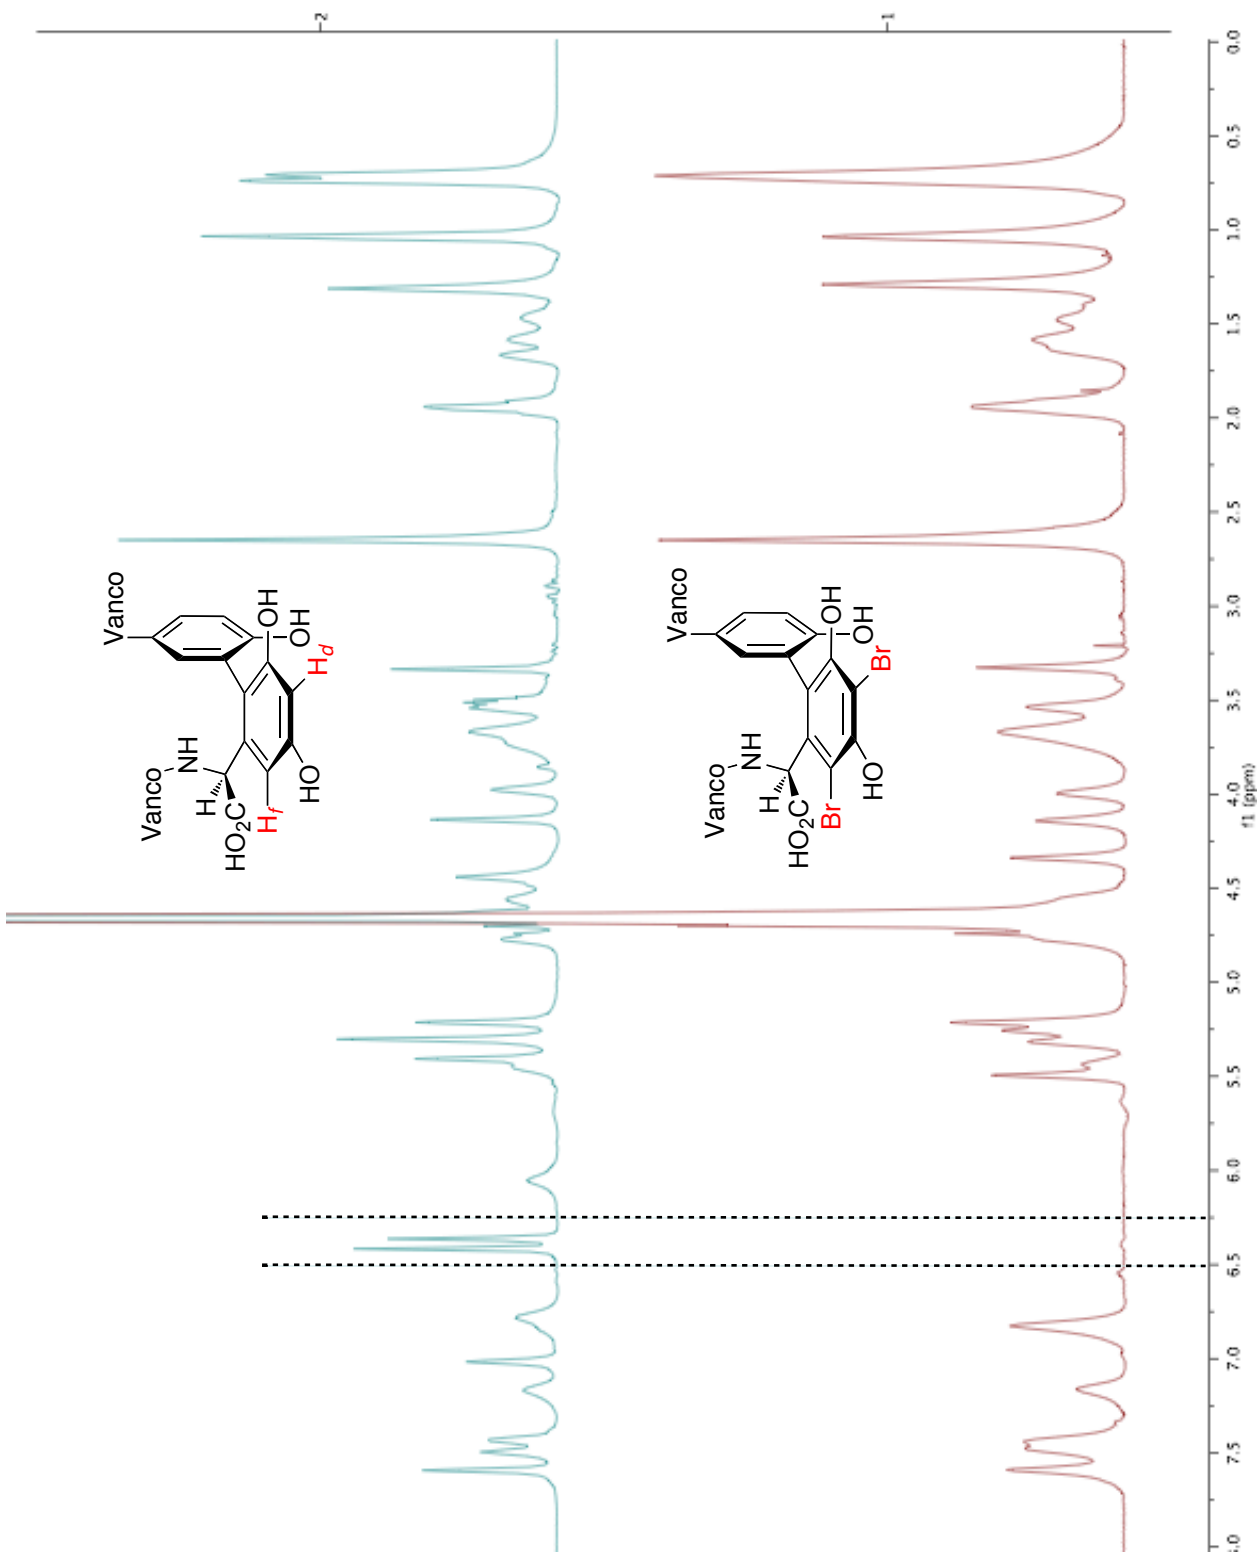

After HPLC purification  
TPP-B2P038

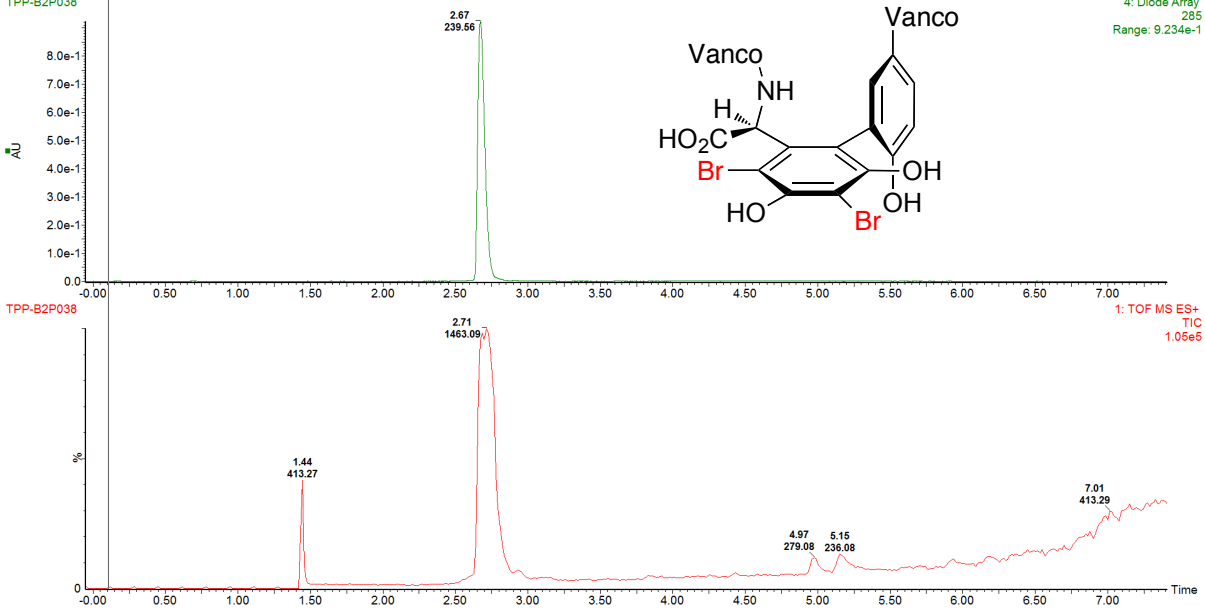

After HPLC purification  
TPP-B2P038 185 (2.794)

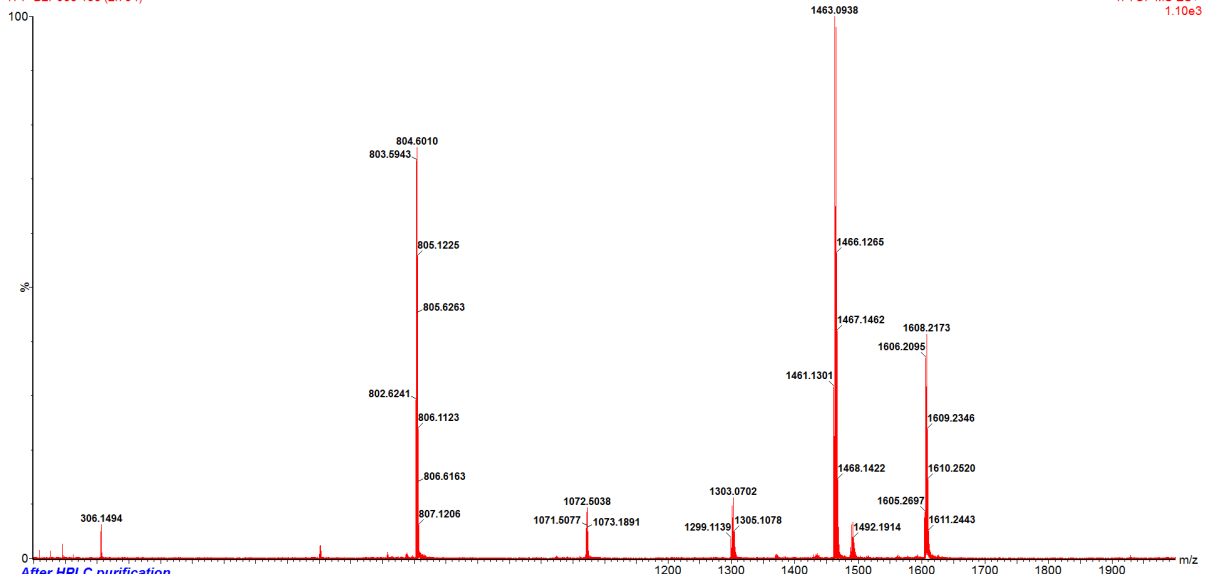

After HPLC purification

TPP-B2P038 (2.794) Is (1.00,1.00) C<sub>66</sub>H<sub>74</sub>Br<sub>2</sub>Cl<sub>2</sub>N<sub>9</sub>O<sub>24</sub>

1: TOF MS ES+  
2.09e12

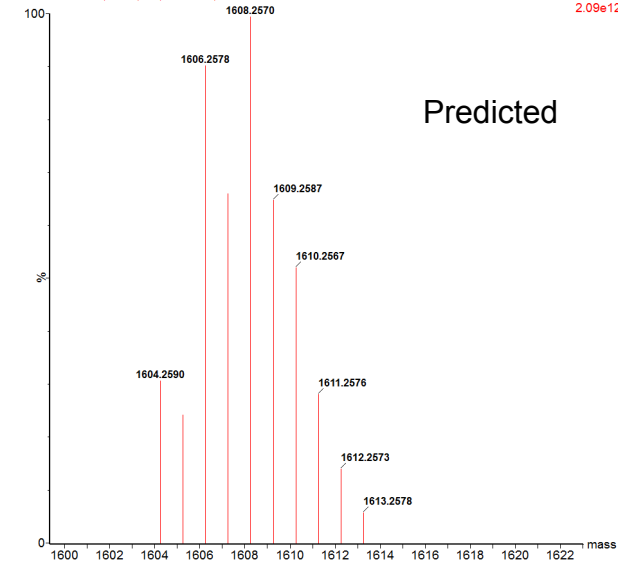

After HPLC purification  
TPP-B2P038 185 (2.794)

1: TOF MS ES+  
453

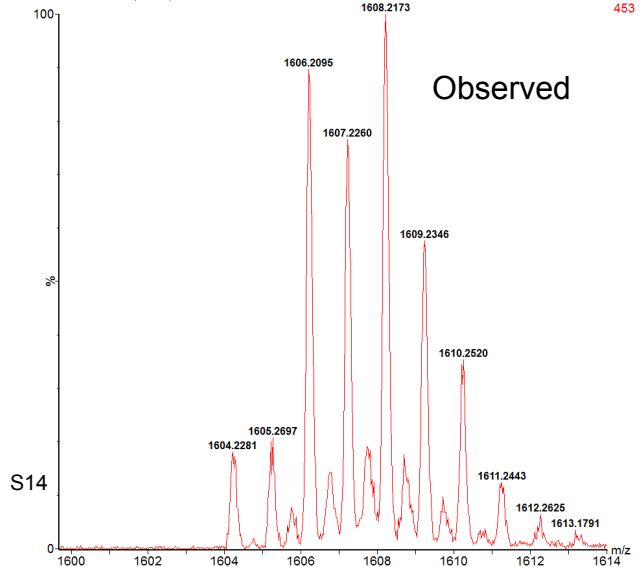

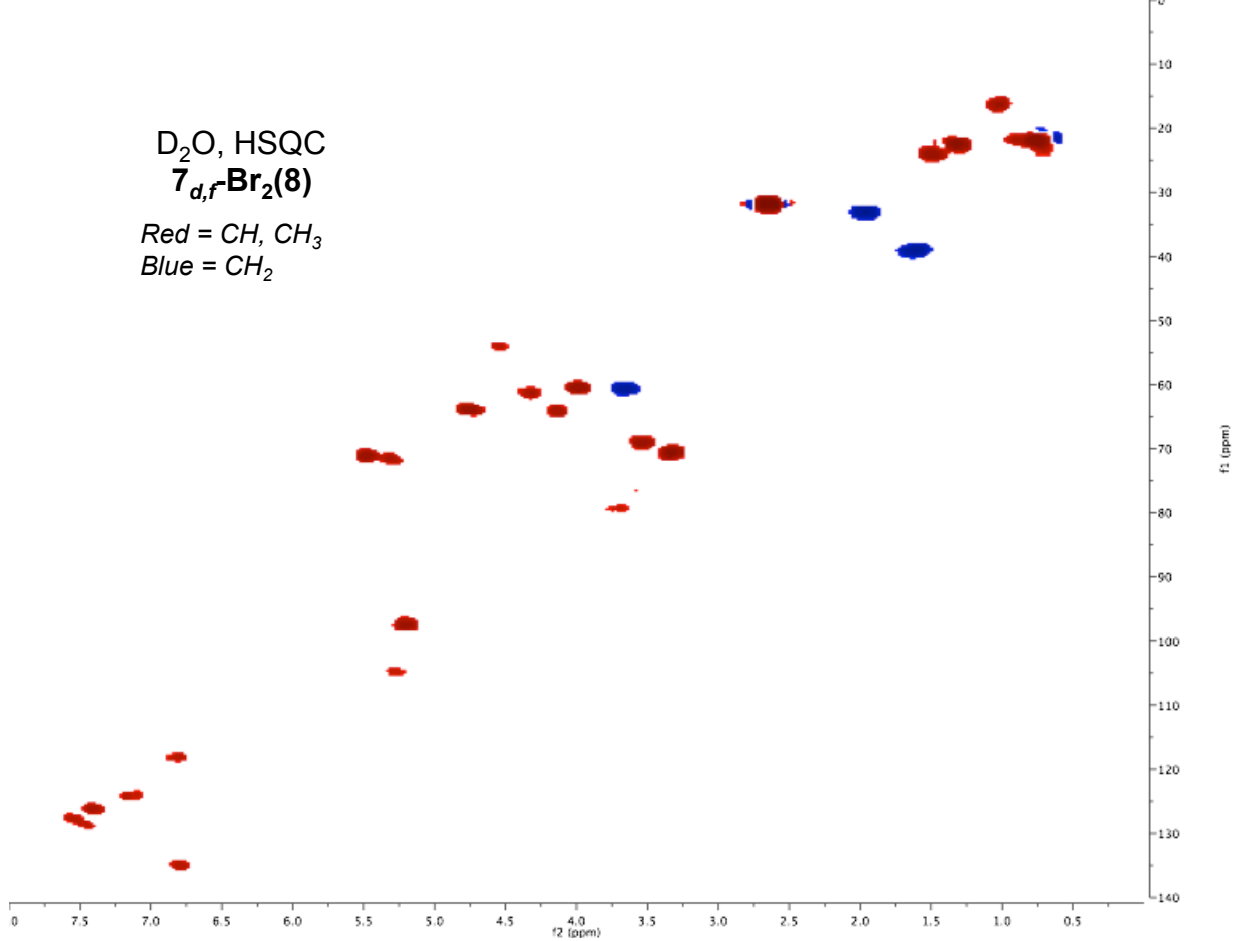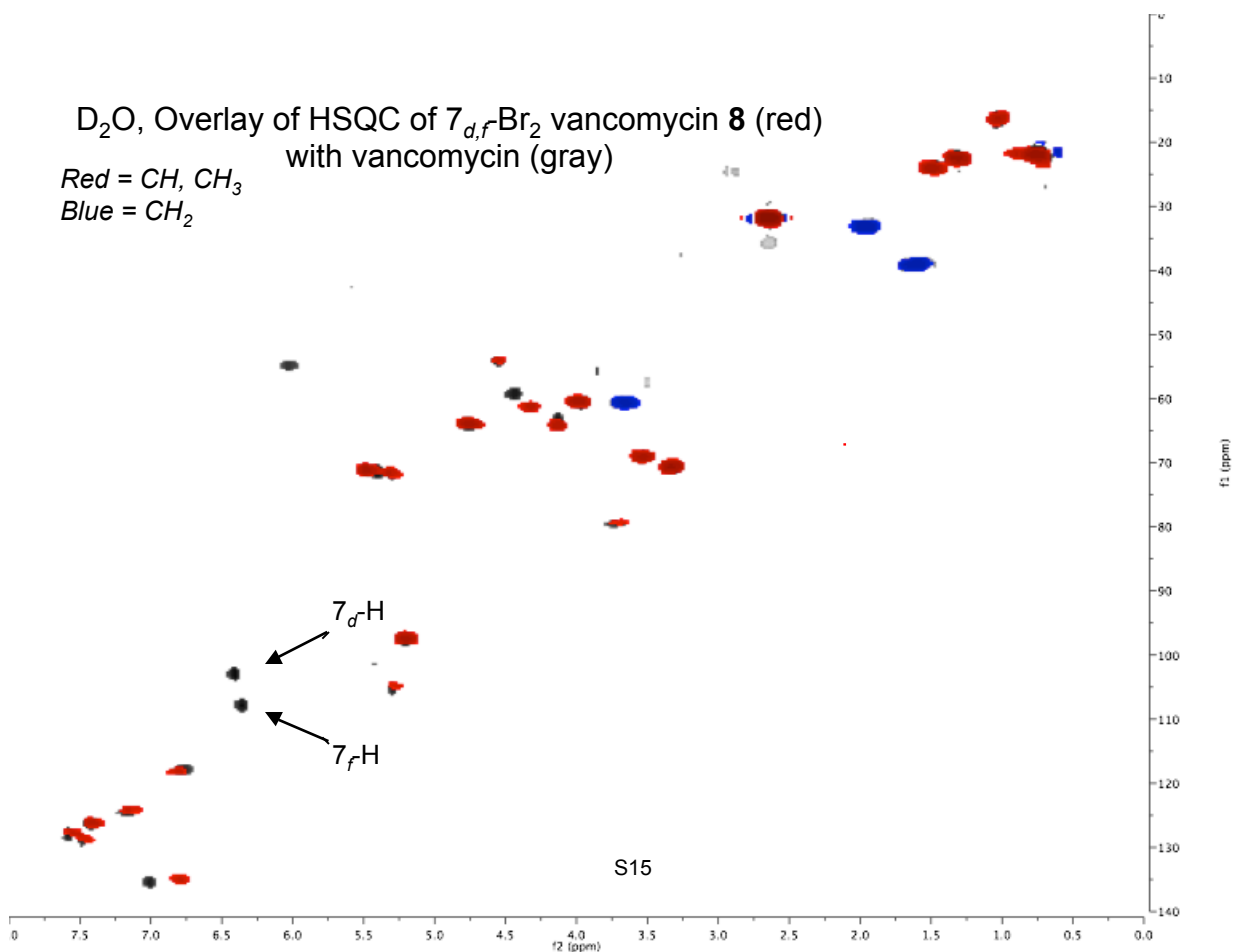

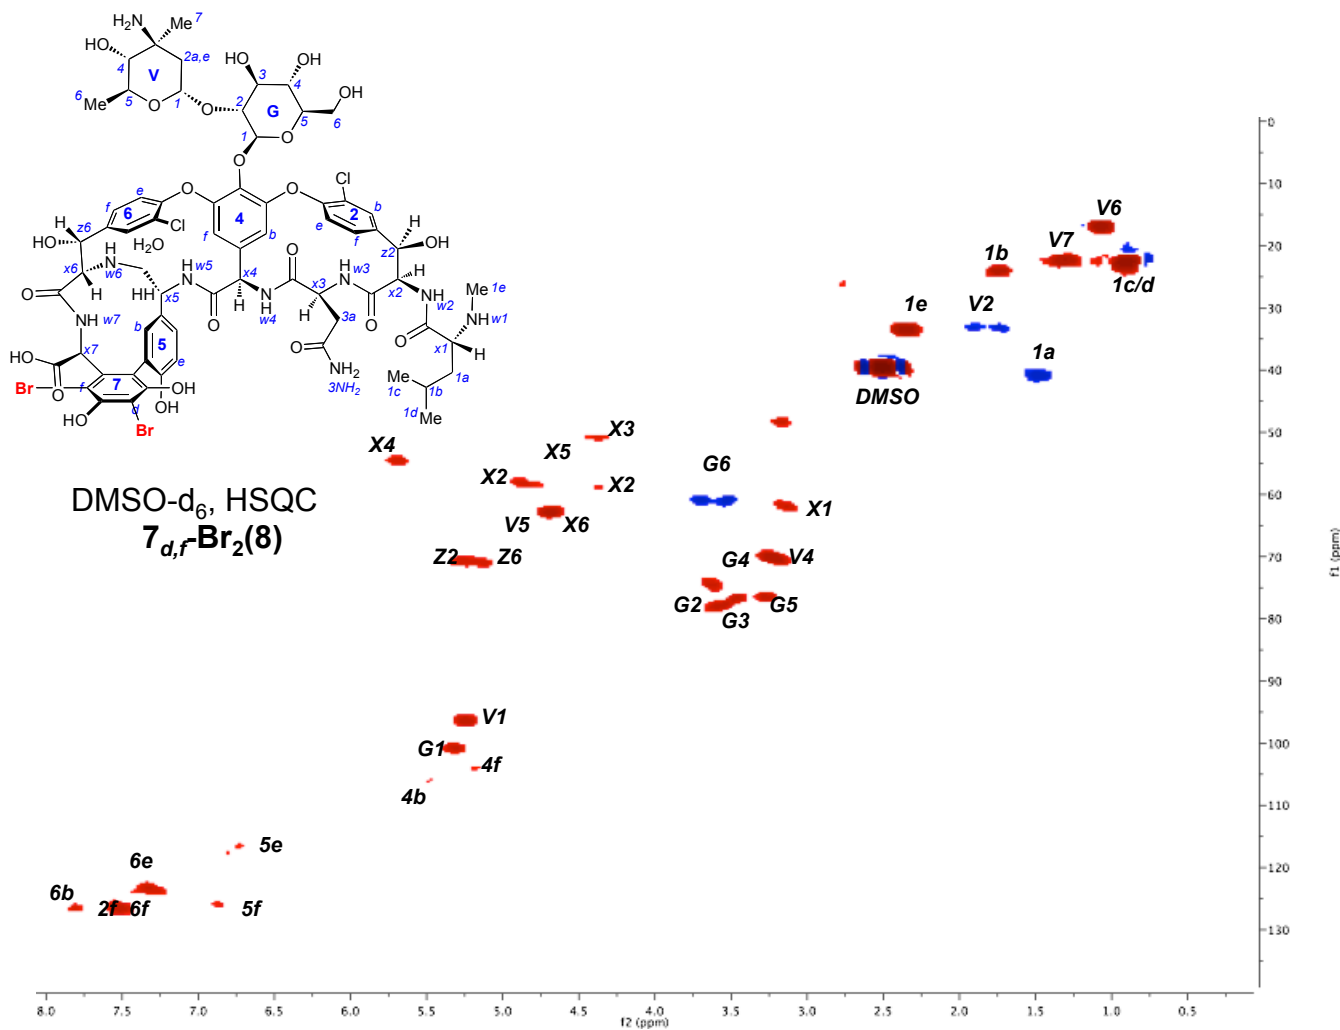



**Procedure for tribromination of Vancomycin (4) Targeting Analog 17 (Manuscript Figure 7):**

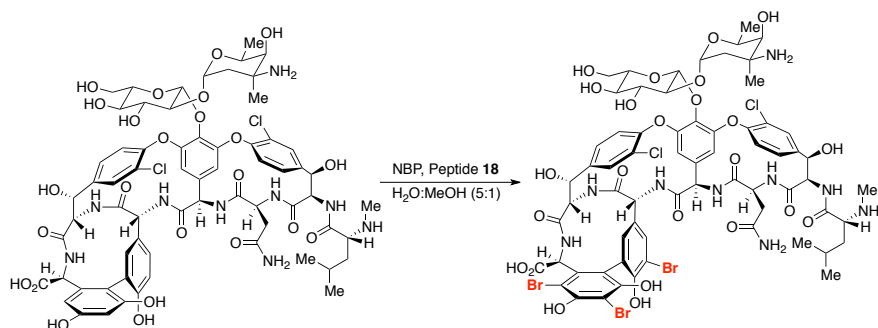

To a round bottom flask equipped with a stir bar were added 49.0 mg (0.033 mmol, 1.0 equiv) of vancomycin•HCl and 15.1 mg (0.033 mmol, 1.0 equiv) of peptide **18**. Water (1.0 mL) and MeOH (0.2 mL) were added to the reaction flask. The reaction mixture was allowed to stir for ca. 5 min, after which 30.1 mg (0.132 mmol, 4.0 equiv) of NBP were added. The reaction mixture was stirred at room temperature for ca. 120 min (over the period of time the reaction became cloudy). To the reaction vessel, 10 mL of EtOAc were added and the reaction was stirred for an additional 15 min. The organic layer was discarded and the aqueous layer was diluted with 2 mL of water. The reaction was analyzed by reverse phase HPLC and was purified by preparative reverse phase HPLC. Purification of reaction mixture yielded, 20.3 mg (35% Yield) tribrominated vancomycin (**17**). ES-HRMS ( $M+H^+$ ): Predicted 1682.1695, observed 1682.1954.

**HPLC Method for preparative purification:** Symmetry prep C8 7 $\mu$ m column (19 X 300 mm), 24 mL/min, starts at 5% MeCN (0.1% HCOOH) : 95% H<sub>2</sub>O (0.1% HCOOH) for 3 min, 5 to 15% MeCN over 20 min, 15 to 95% MeCN over 3 min, hold at 95% MeCN for 3 min, 95% to 5% over 3 min.

**Analytical method:** Symmetry prep C8 7 $\mu$ m column, 4 mL/min, starts at 5% MeCN (0.1% HCOOH) : 95% H<sub>2</sub>O (0.1% HCOOH) for 3 min, 5 to 15% MeCN over 20 min, 15 to 95% MeCN over 3 min, hold at 95% MeCN for 3 min, 95% to 5% over 3 min. Retention time of **17** on C8 column is 20.7 min.

*HPLC trace for the reaction mixture (at 280 nm)*

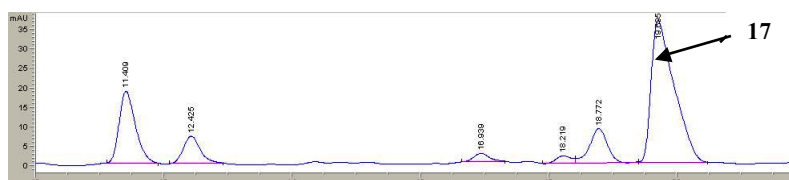

*In lieu of tabulated NMR data, please see raw spectral data provided below.*

HPLC traces of uncatalyzed (top) and peptide-catalyzed (middle and bottom) tribromination of vancomycin obtained on reverse phase HPLC.

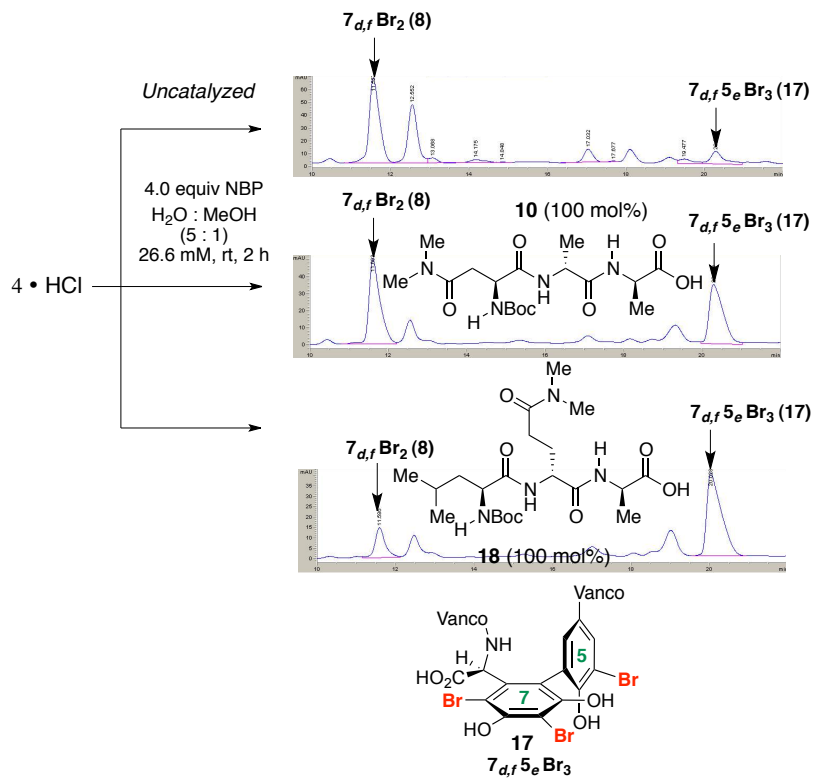

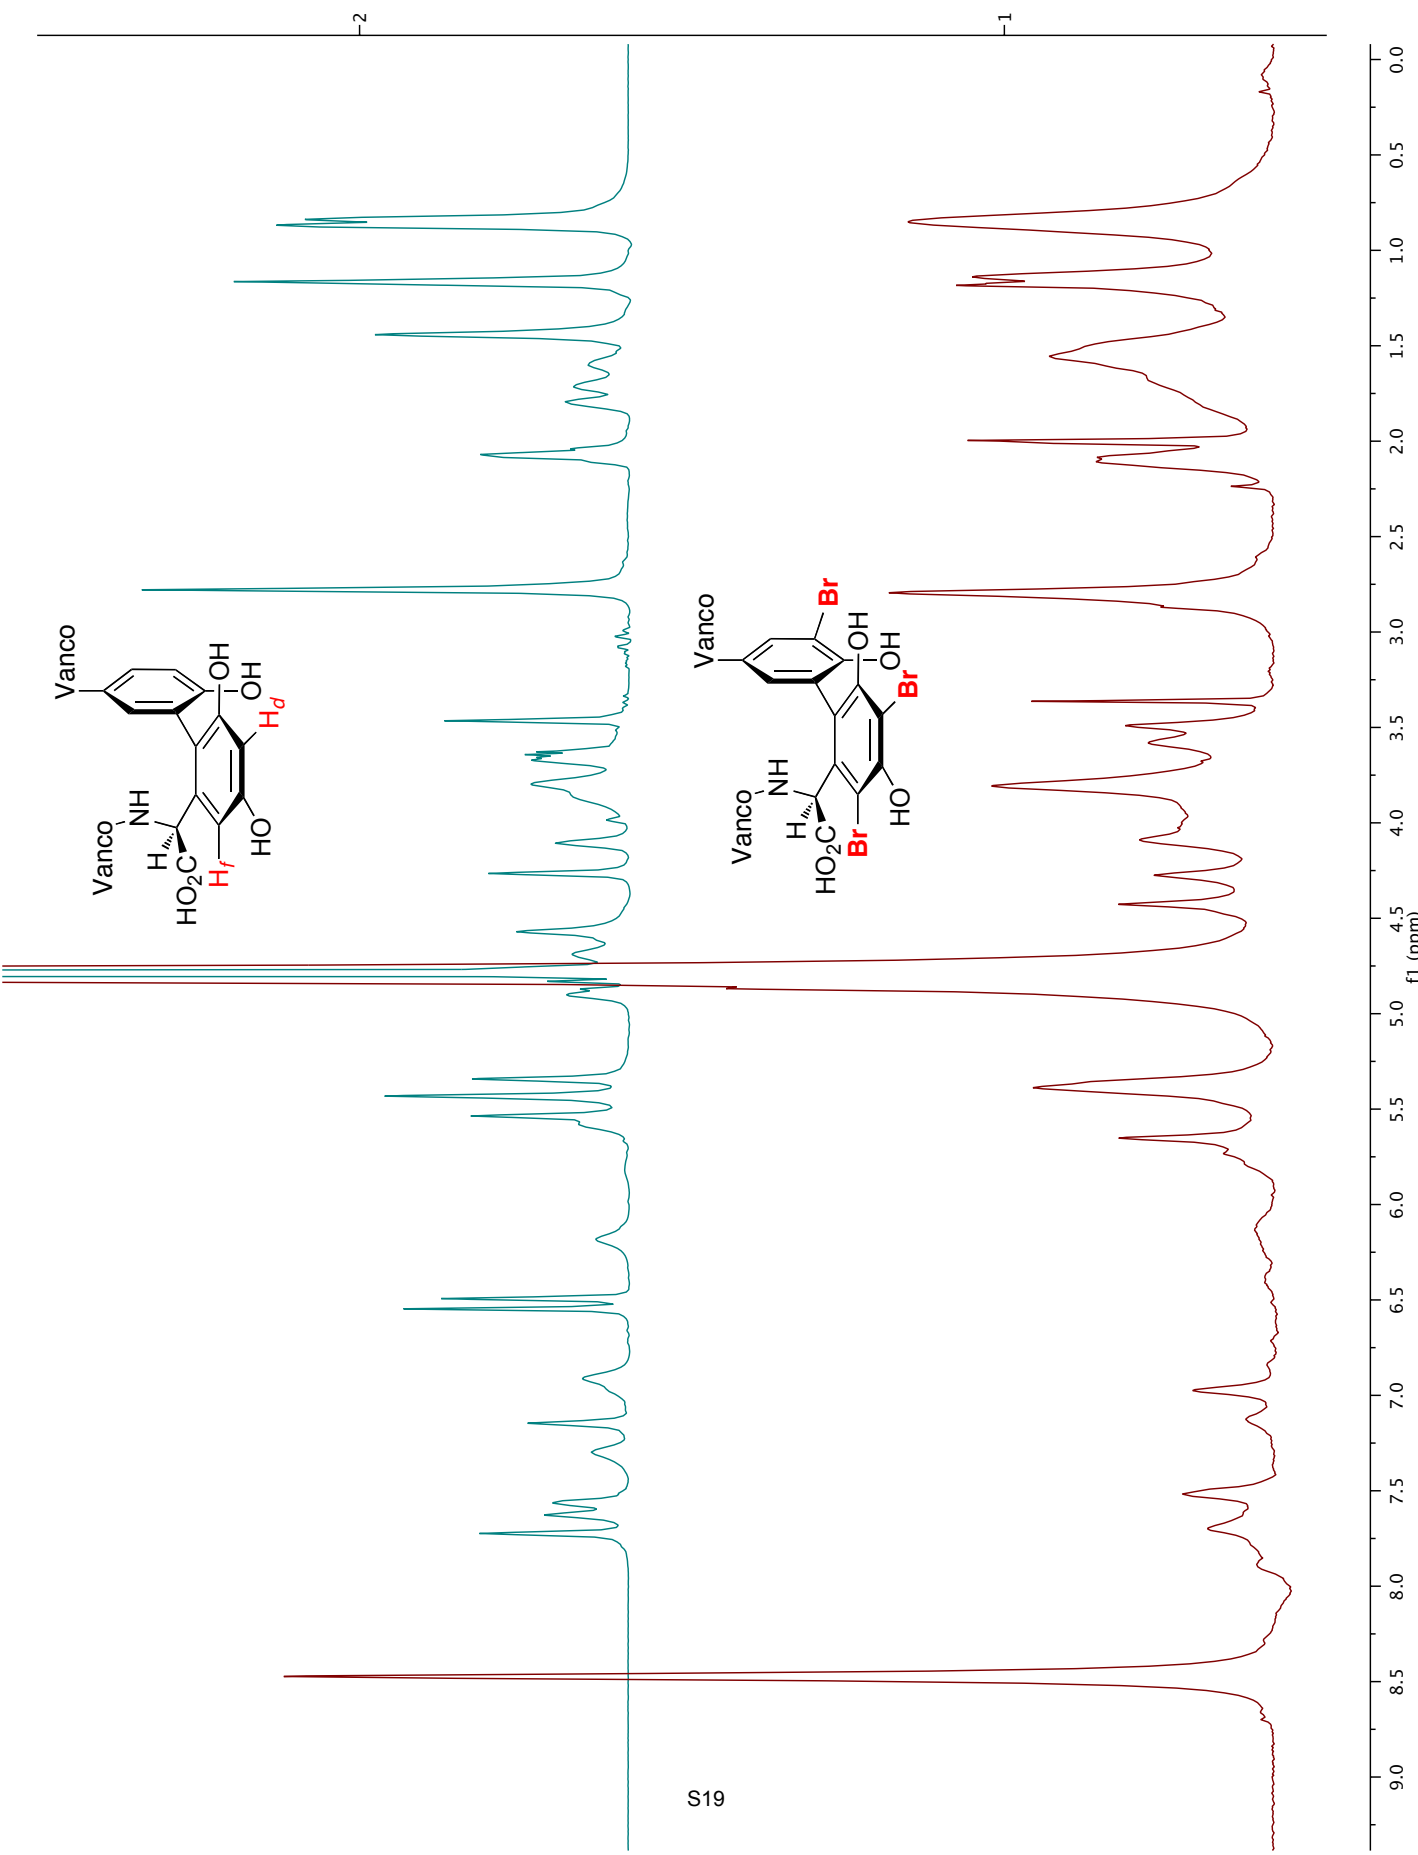

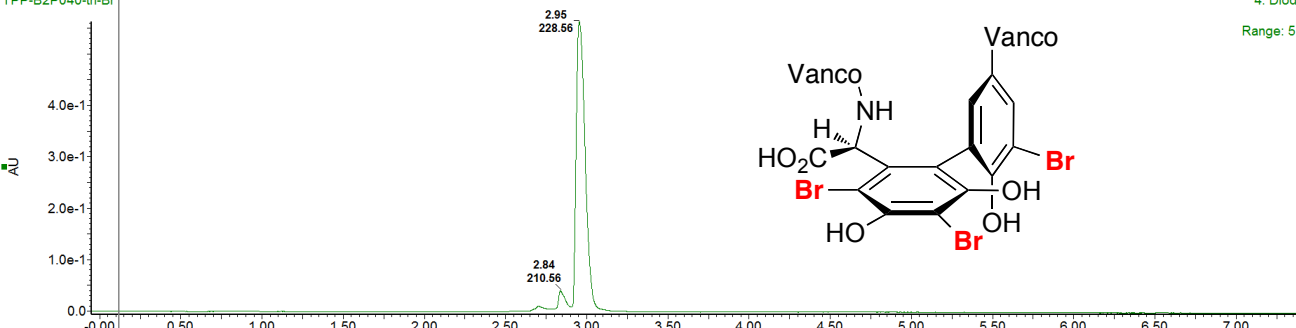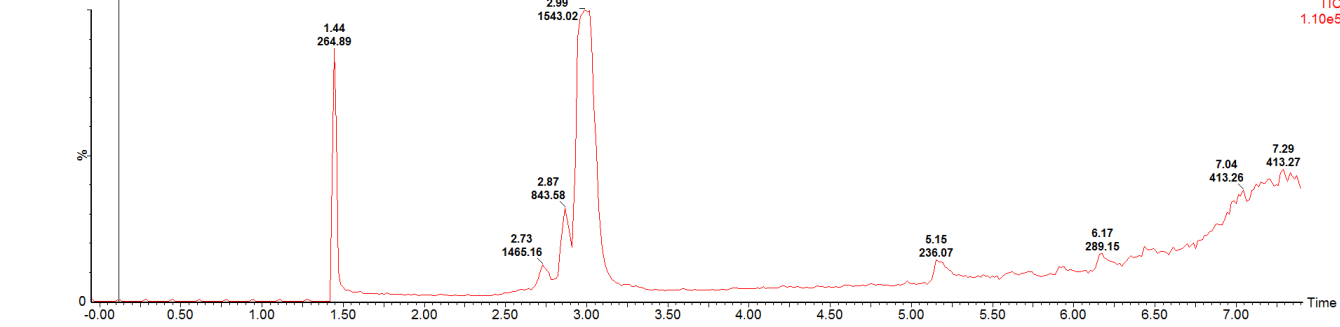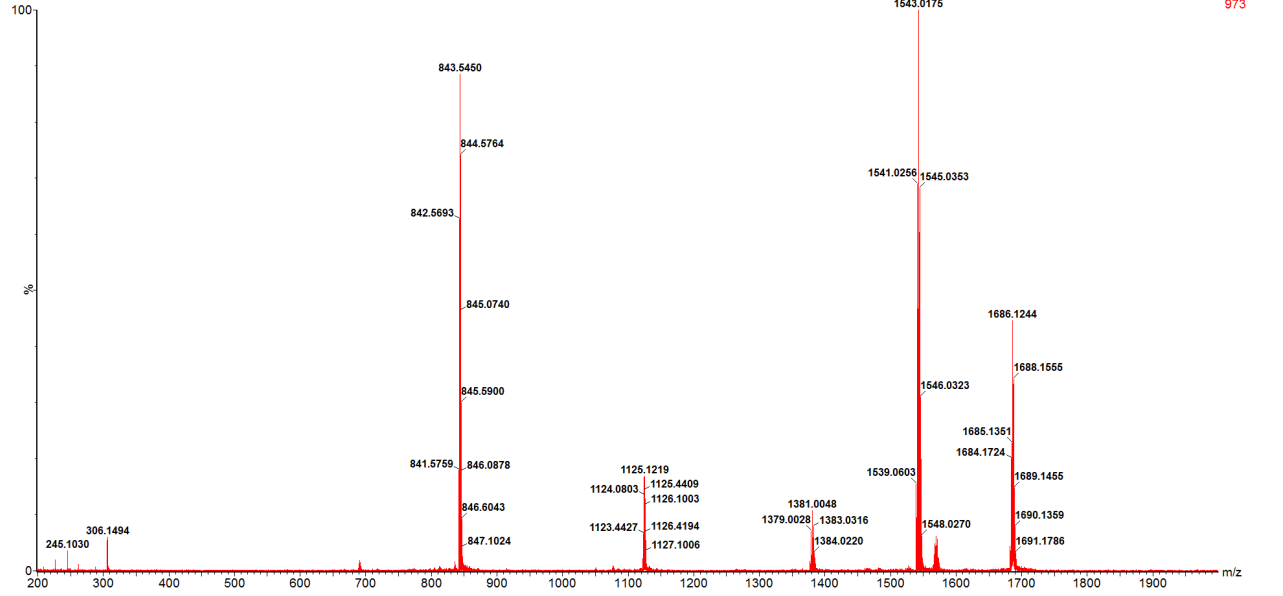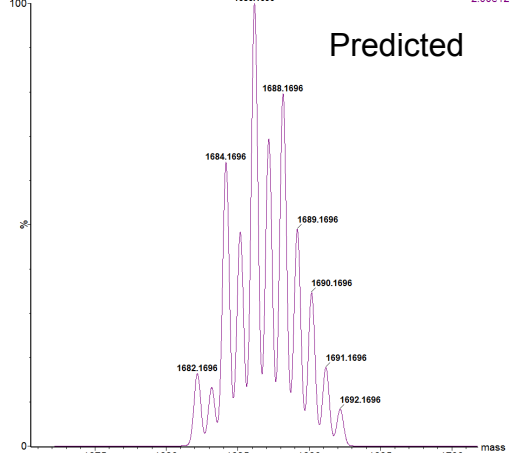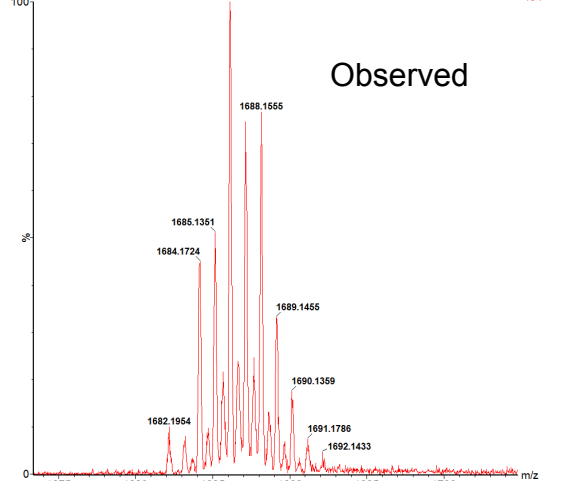

DMSO-d<sub>6</sub>, HSQC

Red = CH, CH<sub>3</sub>  
Blue = CH<sub>2</sub>

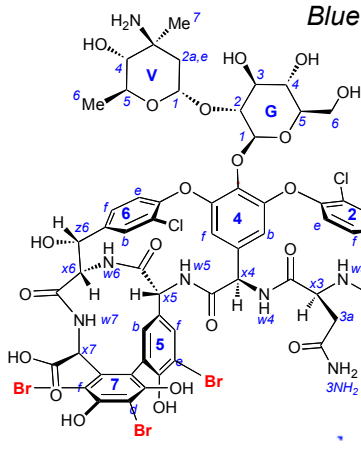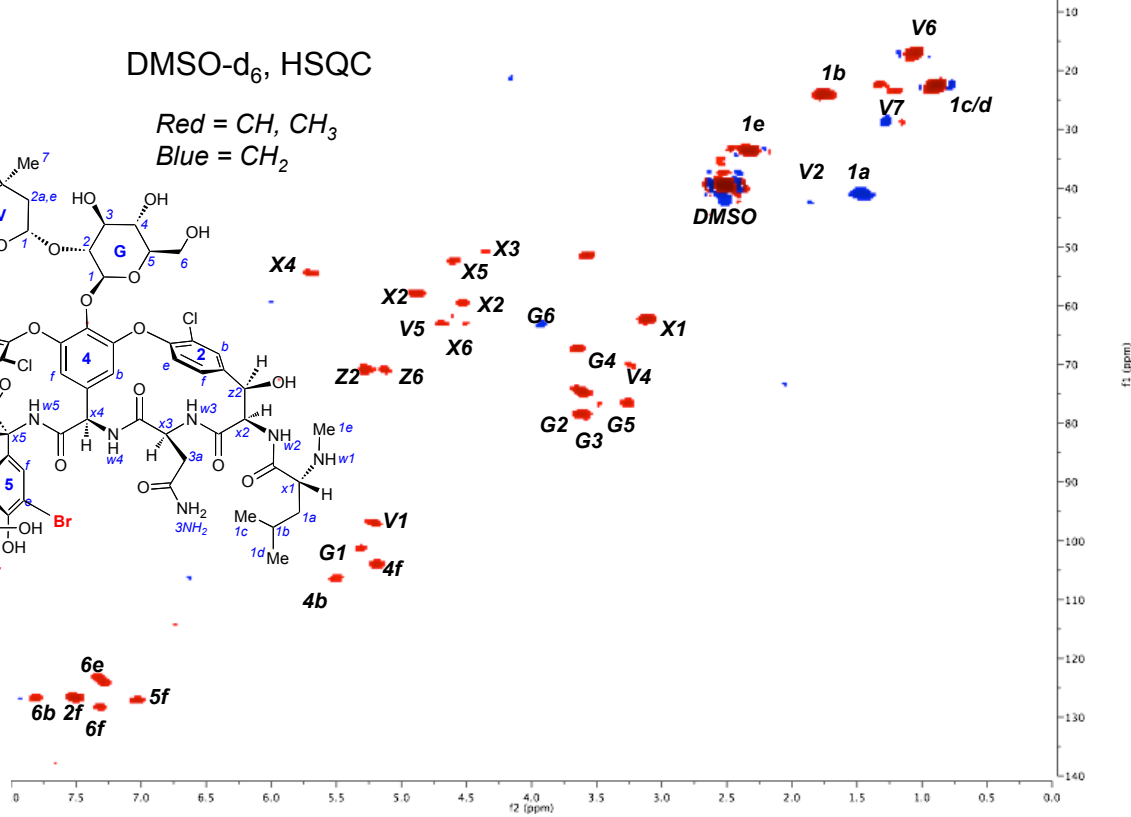

DMSO-d<sub>6</sub>, Overlay of HSQC of tri-brominated vancomycin (red) with vancomycin (gray)

Red = CH, CH<sub>3</sub>  
Blue = CH<sub>2</sub>

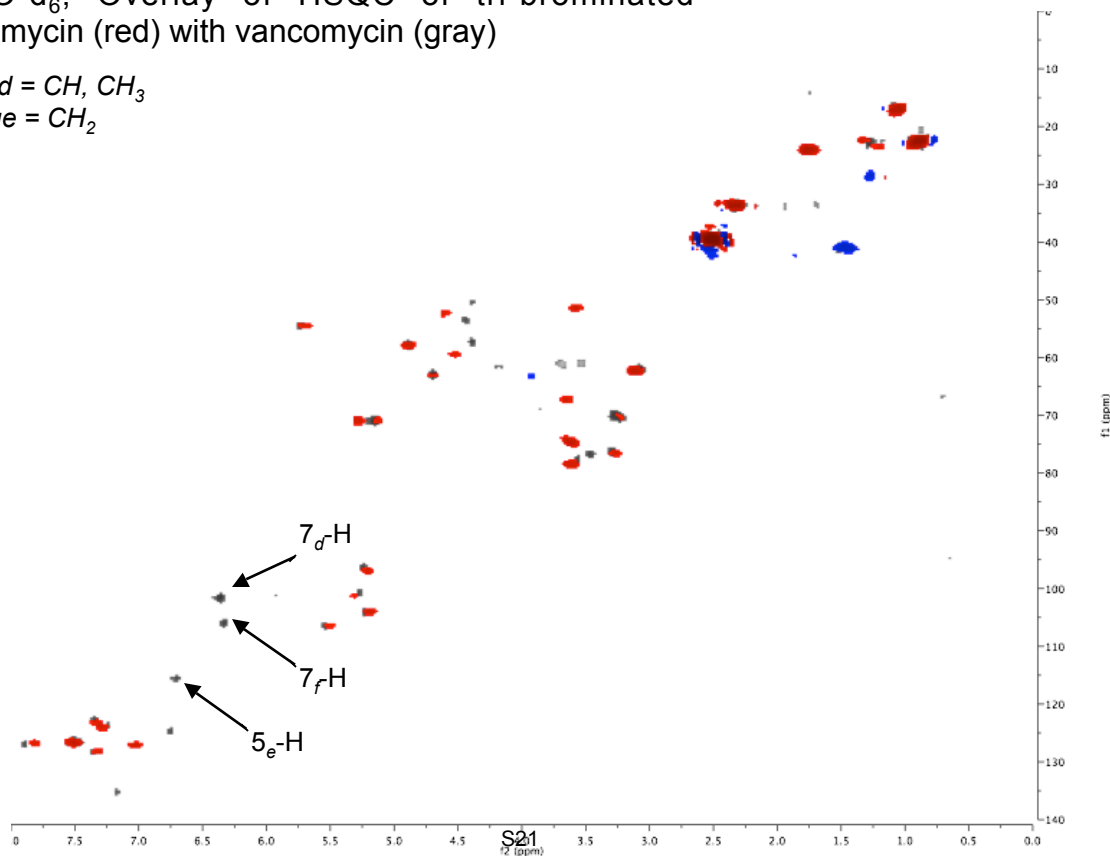

## Procedure for Bromination of Vancomycin (4) Targeting Analog 5.

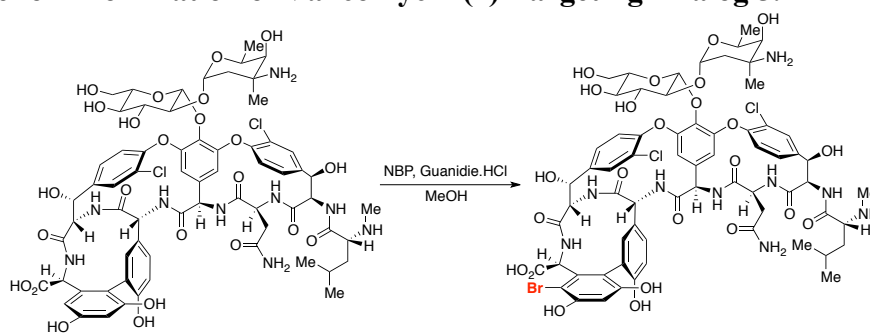

To a round bottom flask equipped with a stir bar were added 100.0 mg (0.067 mmol, 1.0 equiv) of vancomycin•HCl and 114.5 mg (1.206 mmol, 18.0 equiv) of peptide guanidine•HCl. MeOH (16.0 mL) was added to the reaction flask. The reaction mixture was allowed to stir for ca. 5 min after which 61.6 mg (0.27 mmol, 4.0 equiv) of NBP were added. The reaction mixture was stirred at room temperature for 4 h (solution remained cloudy through out the course of a reaction). To the reaction vessel, 10 mL of H<sub>2</sub>O was added and reaction was stirred for an additional 15 min. The MeOH was removed in vacuo and reaction was analyzed by reverse phase HPLC and was purified by preparative reverse phase HPLC. Purification of reaction mixture yielded, 23.3 mg (21% Yield) 7<sub>f</sub>-Br Vancomycin (5). ES-HRMS (M+H<sup>+</sup>): Predicted 1526.3485, observed 1526.3184.

**HPLC Method for preparative purification:** Symmetry prep C8 7 $\mu$ m (19 X 300 mm) column, 24 mL/min, starts at 5% MeCN (0.1% HCOOH) : 95% H<sub>2</sub>O (0.1% HCOOH) for 3 min, 5 to 8.5% MeCN over 15 min, 8.5 to 95% MeCN over 3 min, hold at 95% MeCN for 3 min, 95% to 5% over 3 min.

**Analytical method:** Symmetry prep C8 7 $\mu$ m column, 4 mL/min, starts at 5% MeCN (0.1% HCOOH) : H<sub>2</sub>O (0.1% HCOOH) for 3 min, 5 to 8.5% MeCN over 15 min, 8.5 to 95% MeCN over 3 min, hold at 95% MeCN for 3 min, 95% to 5% over 3 min. Retention time of 5 on C8 column is 11.6 min.

HPLC trace for the reaction mixture *with guanidine* (at 280 nm):

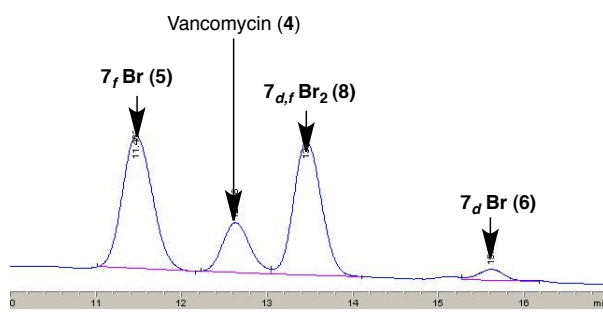

*In lieu of tabulated NMR data, please see raw spectral data provided below.*

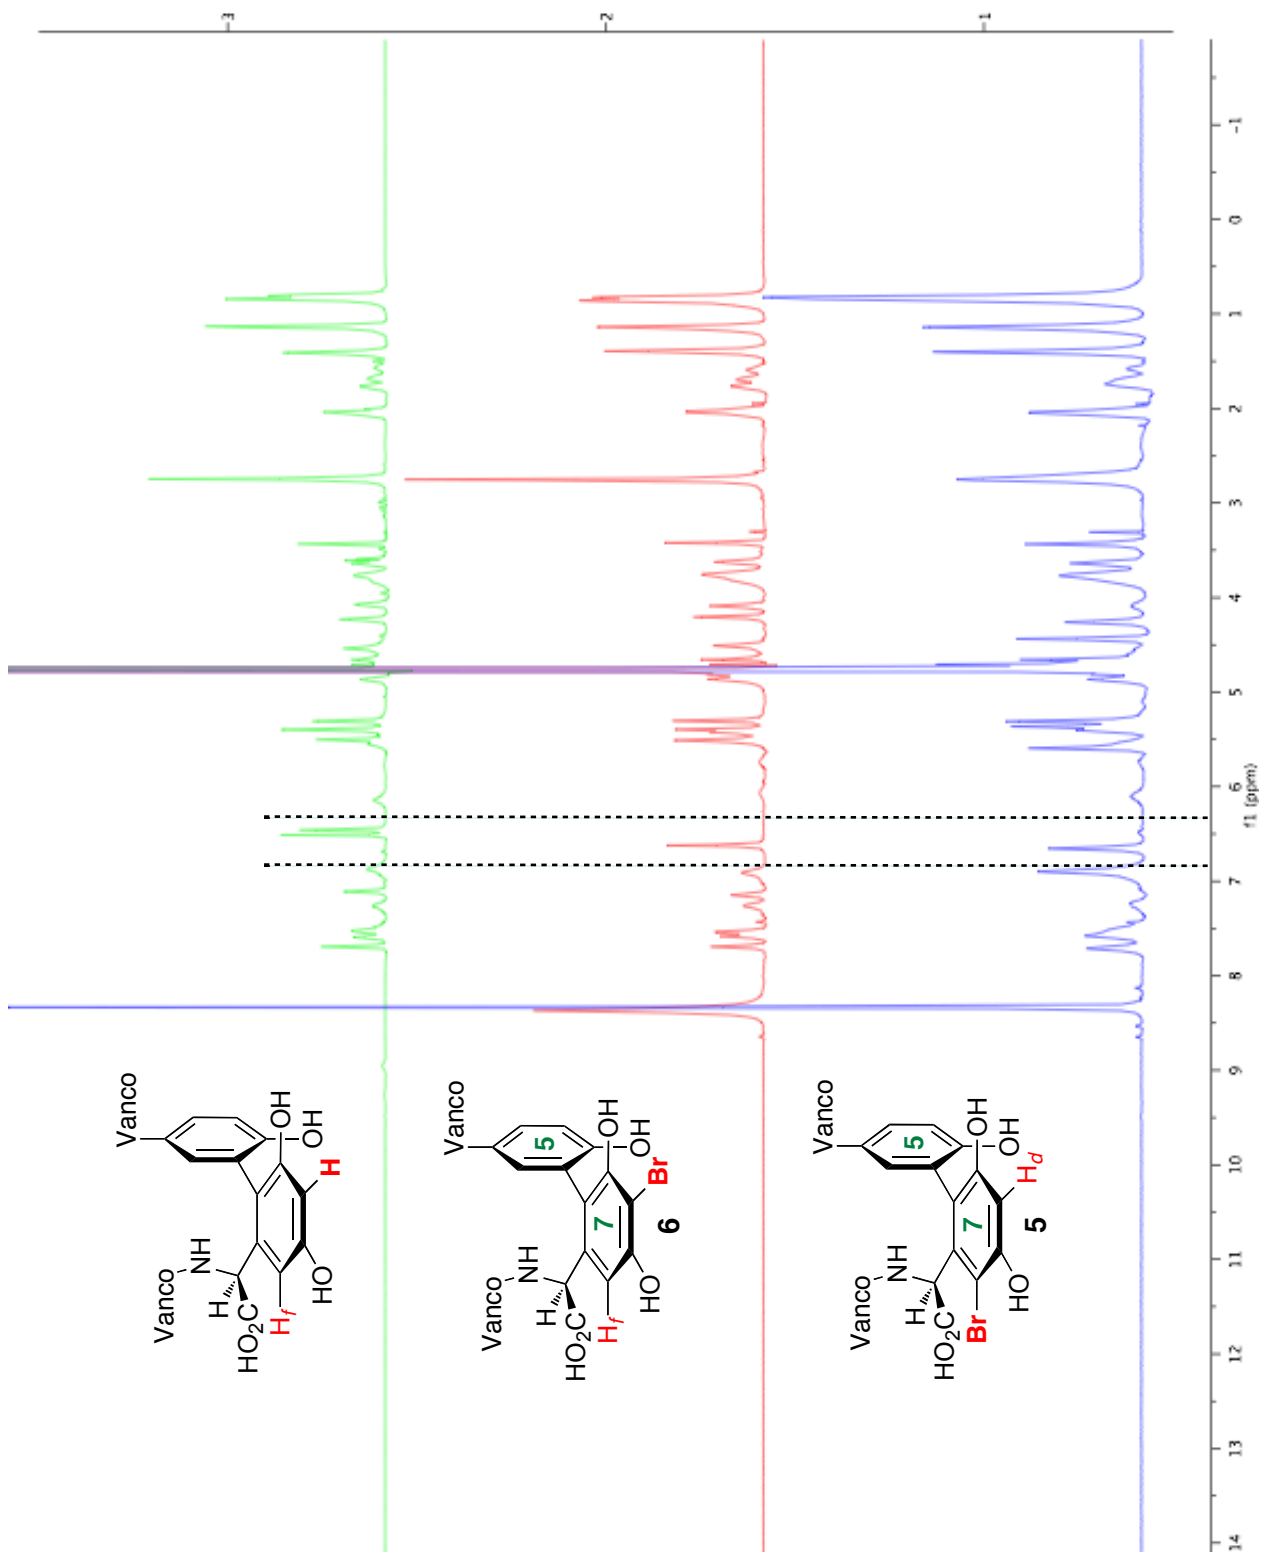

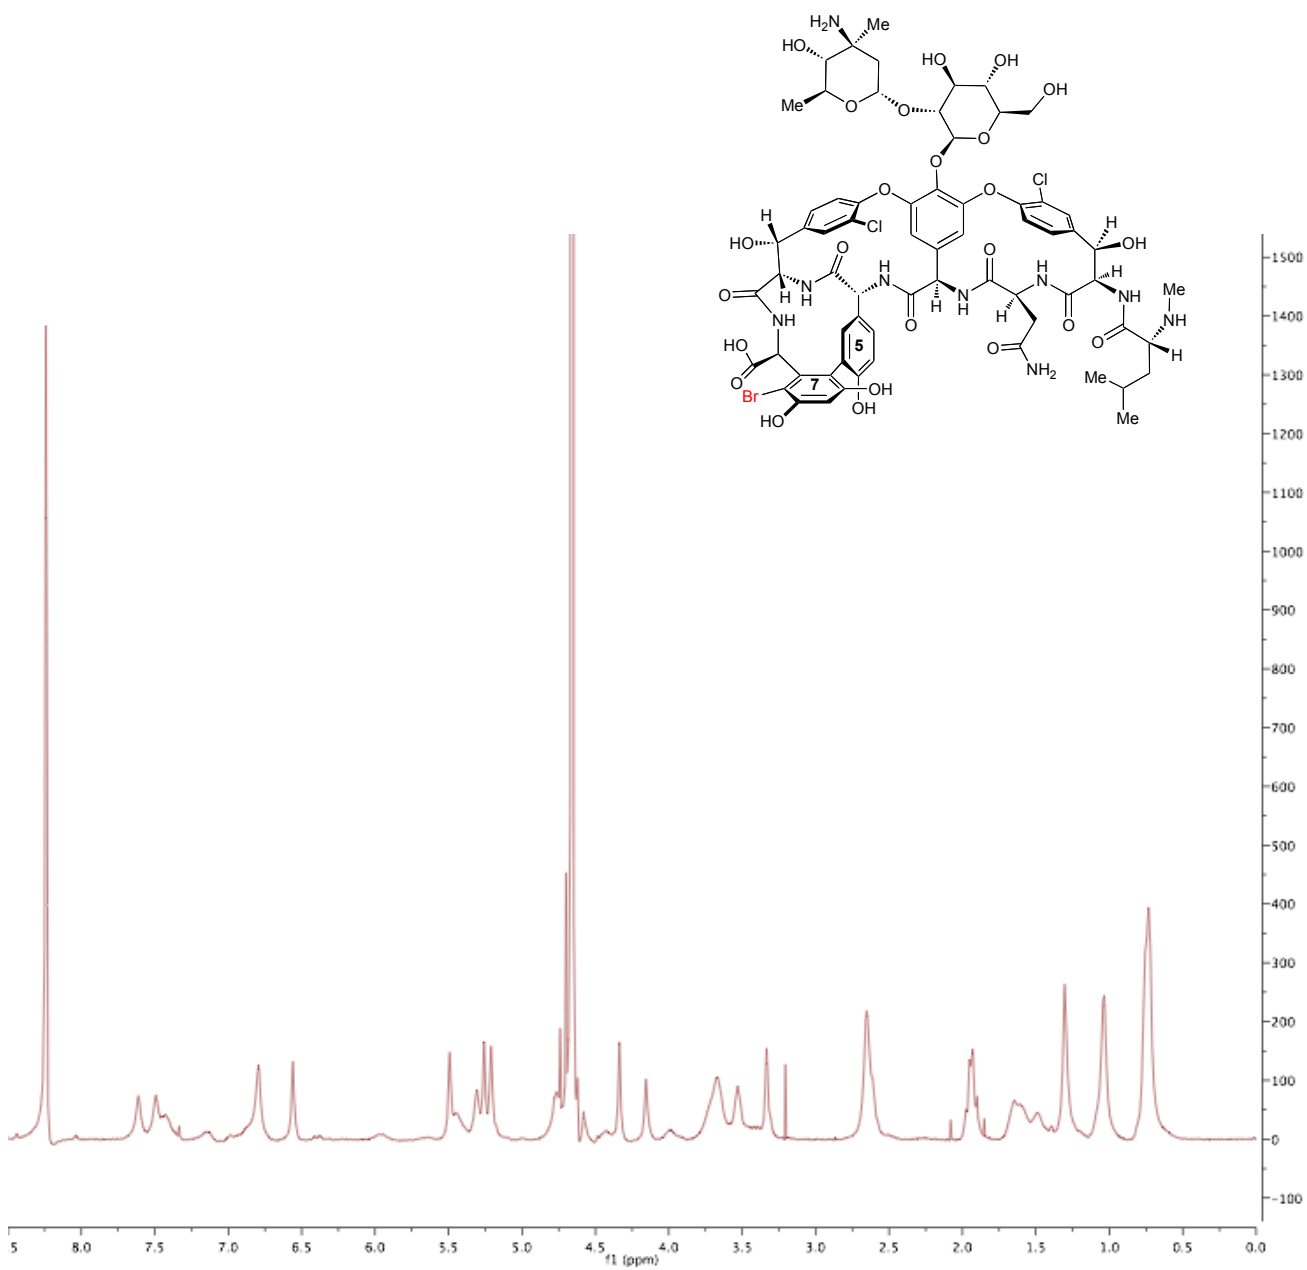



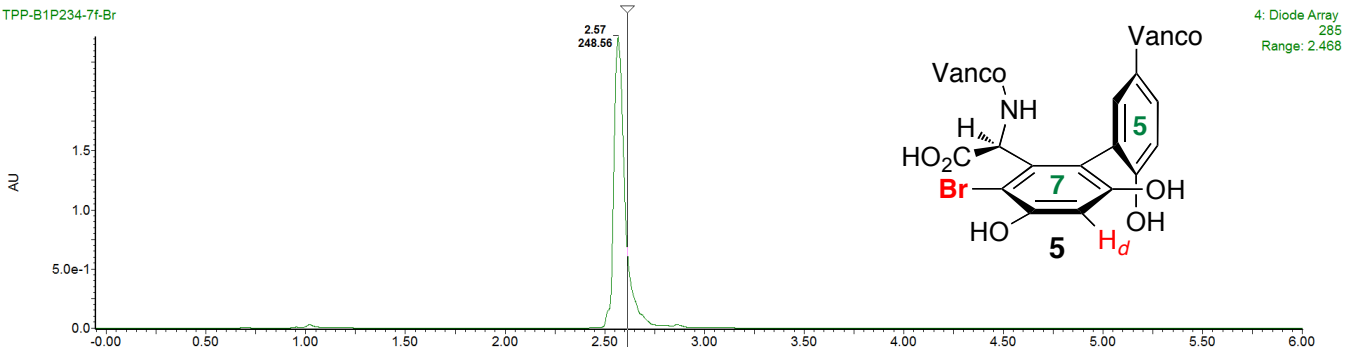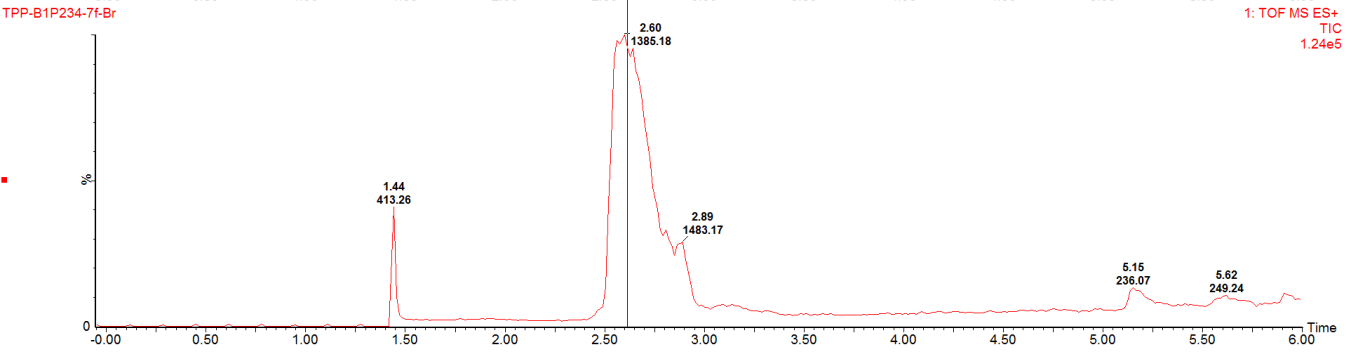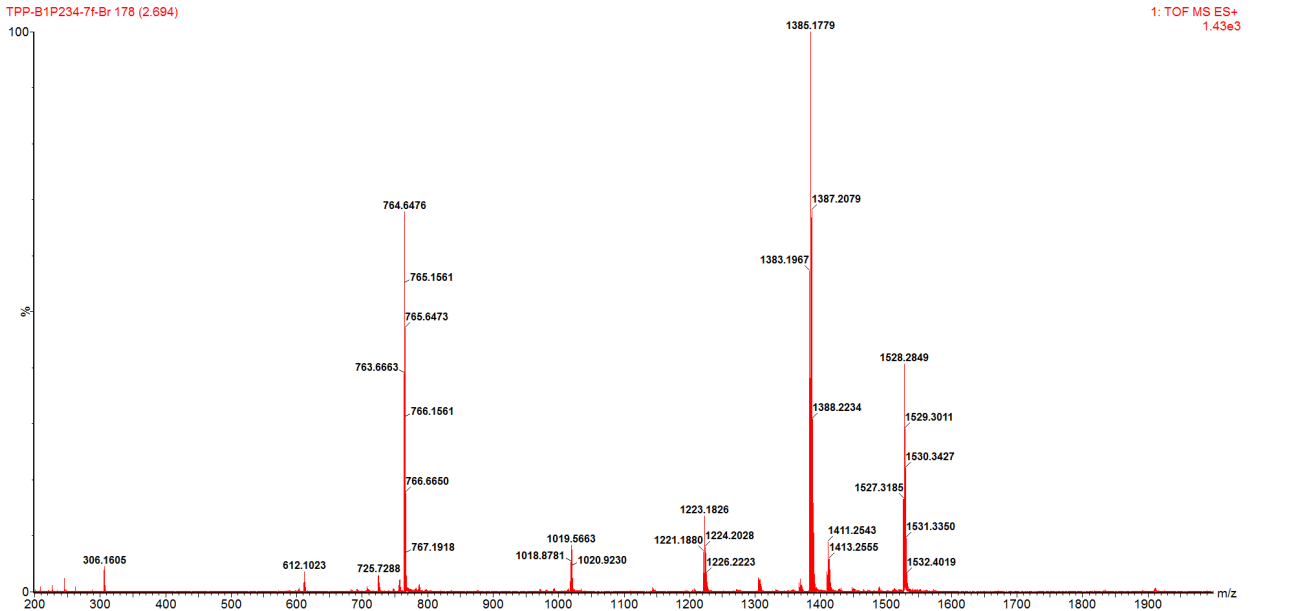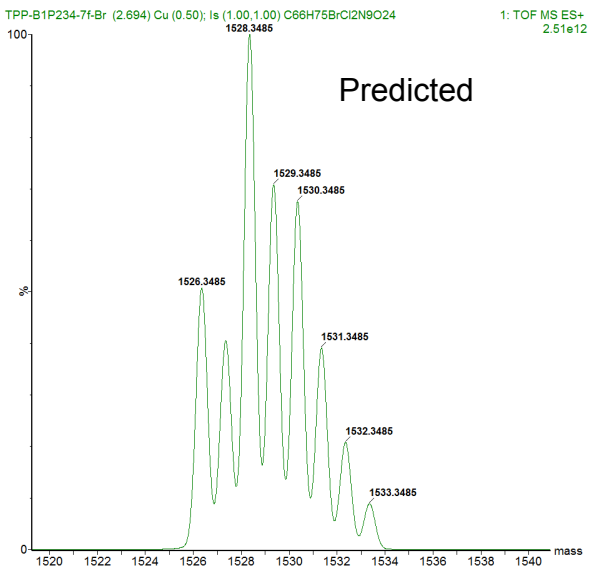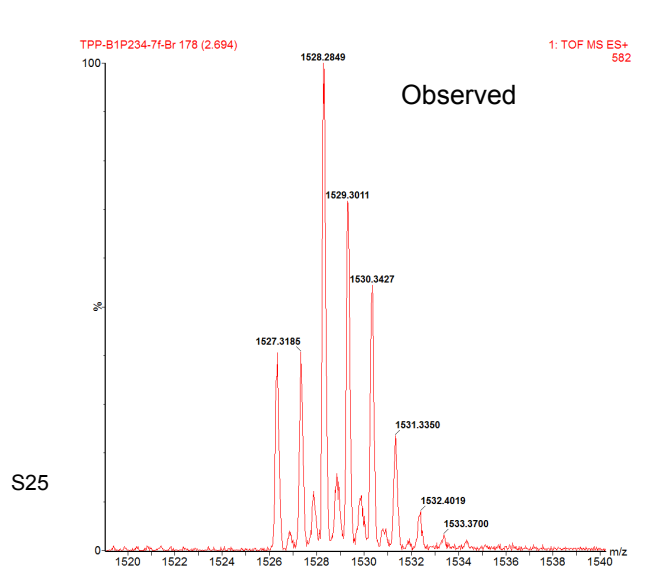

S25

D<sub>2</sub>O, HSQC  
7f-Br(5)

Red = CH, CH<sub>3</sub>  
Blue = CH<sub>2</sub>

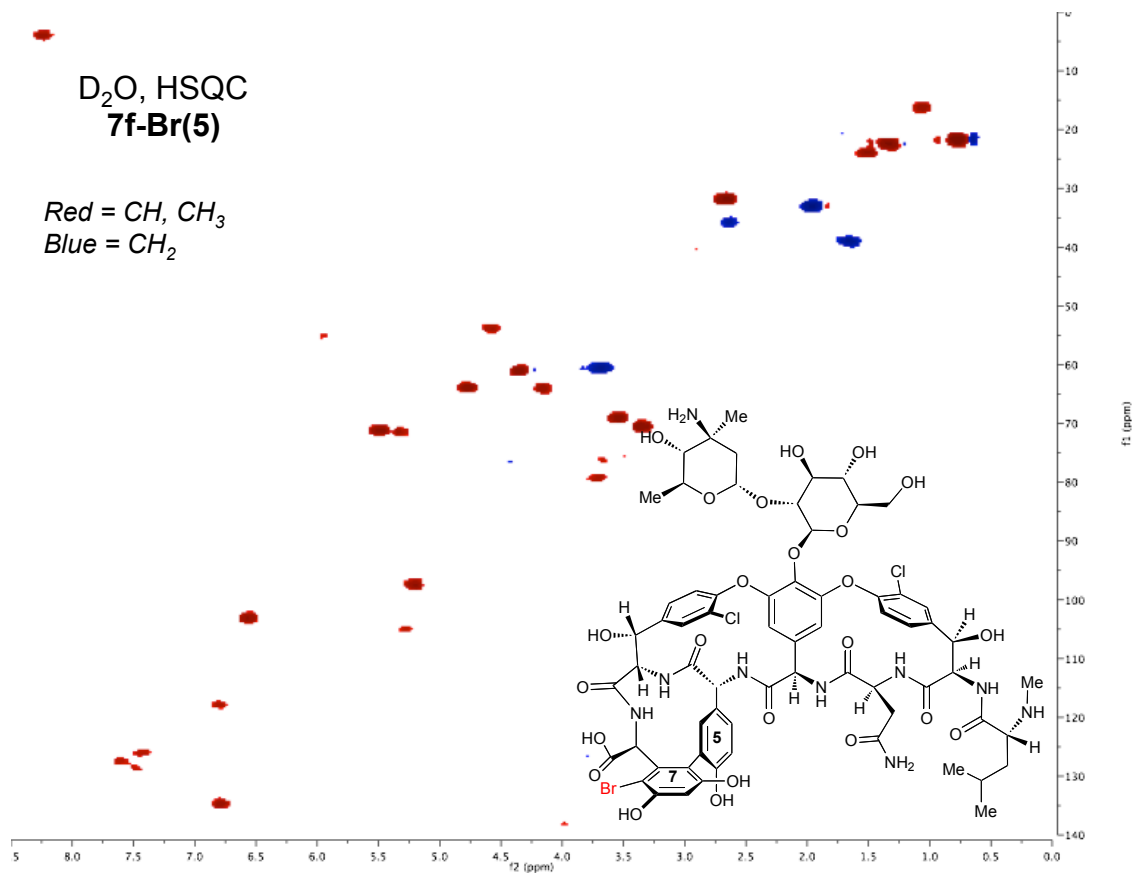

D<sub>2</sub>O, Overlay of HSQC of 7<sub>f</sub>-Br vancomycin 5  
(red) with vancomycin (gray)

Red = CH, CH<sub>3</sub>  
Blue = CH<sub>2</sub>

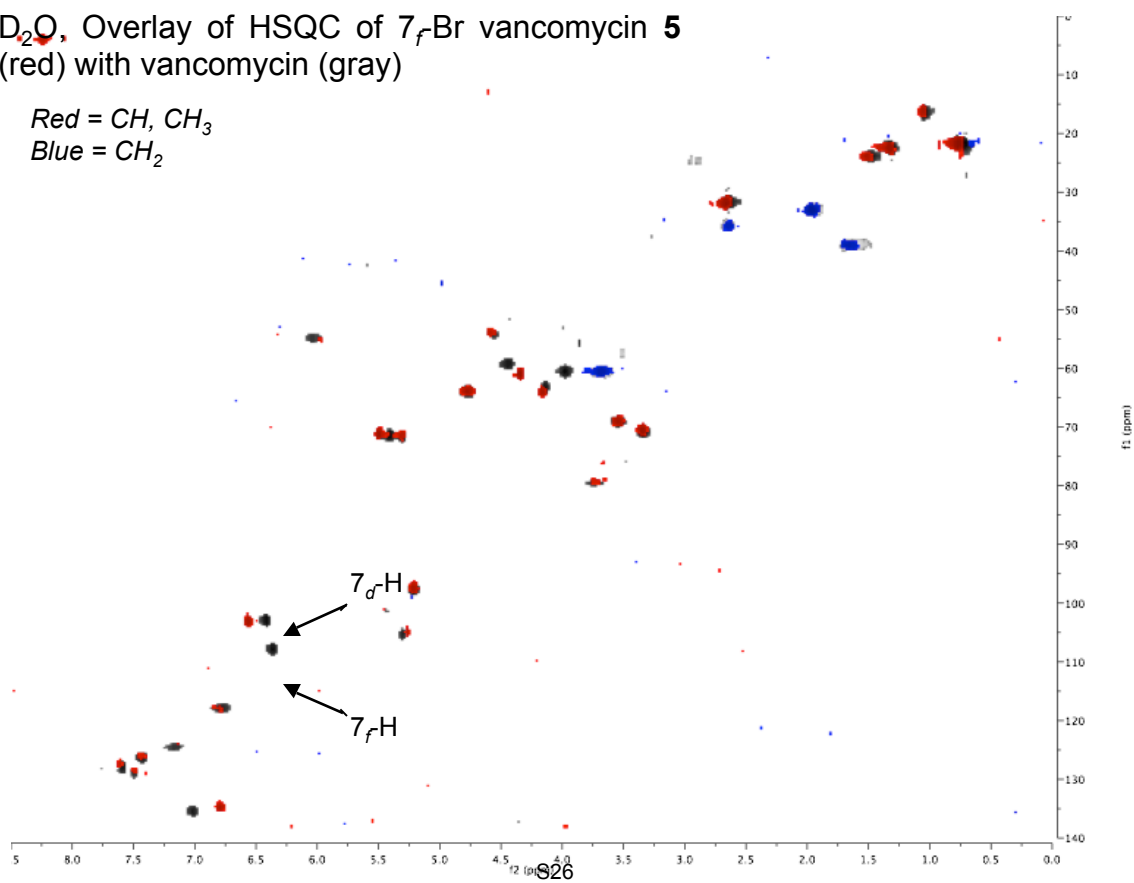

DMSO-d<sub>6</sub>, HSQC

**7<sub>f</sub>Br(5)**

Red = CH, CH<sub>3</sub>

Blue = CH<sub>2</sub>

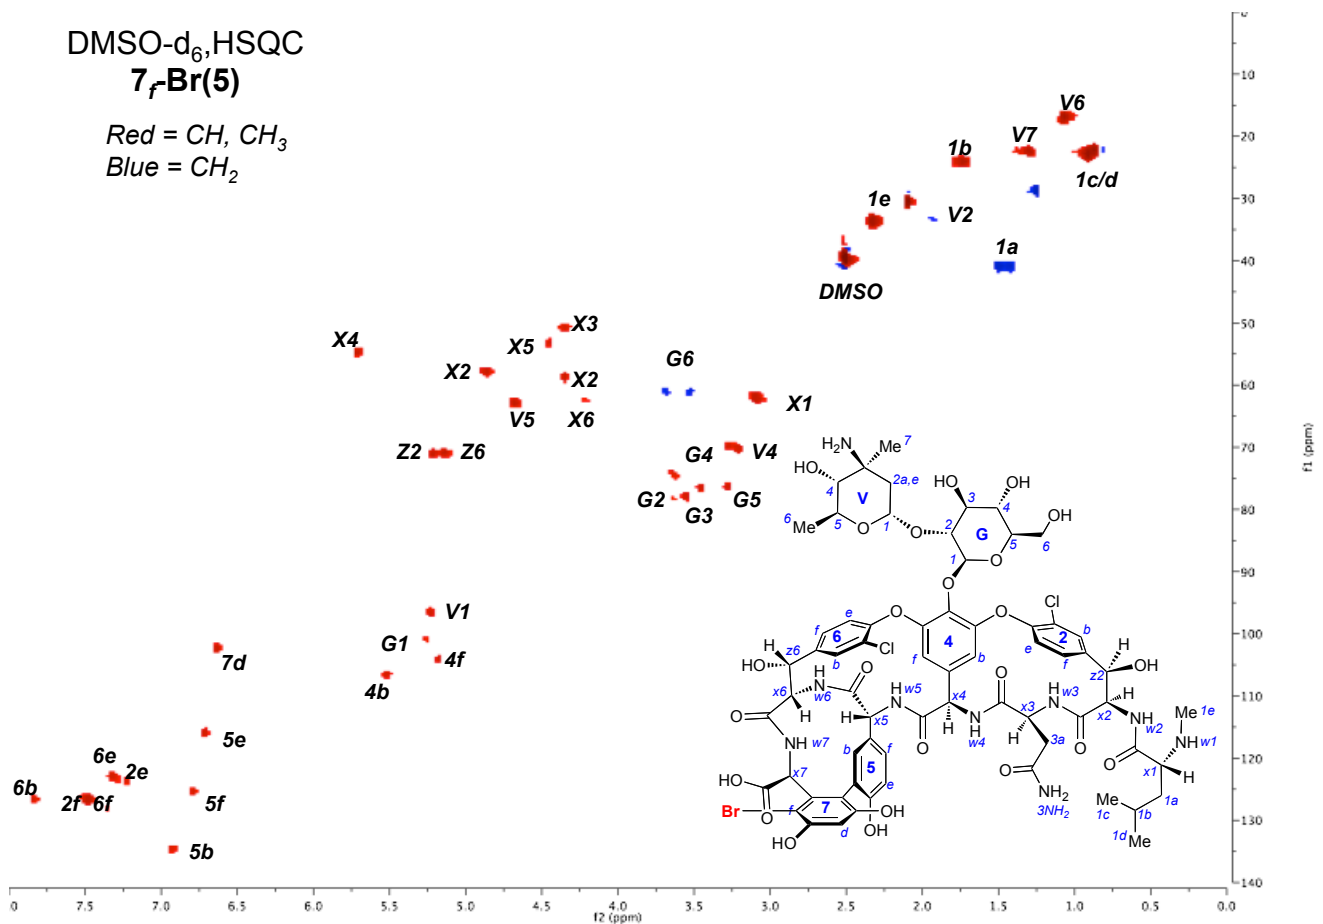

DMSO-d<sub>6</sub>, ROESY

**7<sub>f</sub>Br(5)**

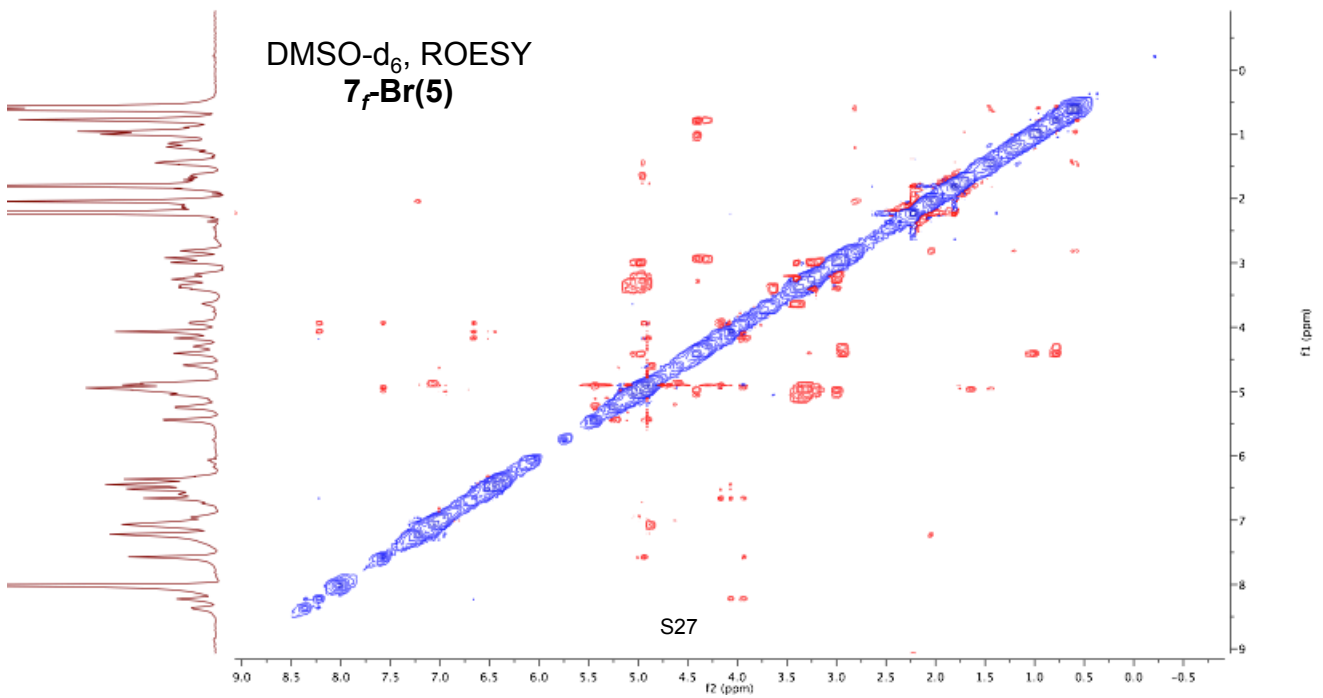

## Peptide Synthesis:

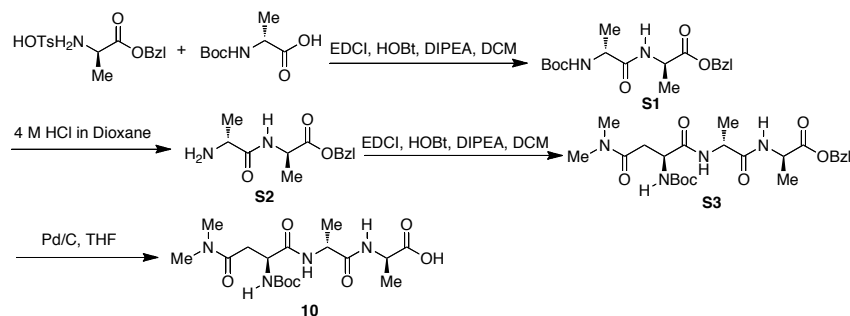

**Synthesis of Peptide 10:** To a dry 50 mL RBF equipped with stir bar were added 541.0 mg (2.86 mmol, 1.0 equiv.) of Boc-DAla-OH, 1.00 g (3.15 mmol, 1.1 equiv) of TsOH•H-DAla-OBzl, 819.0 mg (3.15 mmol, 1.1 equiv) of EDCI•HCl and 664.0 mg (3.15 mmol, 1.1 equiv) of HOBT•H<sub>2</sub>O. To this, 10 mL of DCM was added and the reaction mixture was stir for *ca.* 10 min. At this point, 700  $\mu\text{L}$  (4.29 mmol, 1.5 equiv) of DIPEA were added. The reaction mixture was allowed to stir overnight at room temperature and reaction progress was monitored by LCMS. Upon complete conversion of starting material, 10 mL of 10% aq. citric acid solution (w/w) was added and reaction was stirred for 5 min. The reaction mixture was transferred to separatory funnel and was diluted with 70 mL of EtOAc. The aqueous layer was removed and organic layer was washed again with 10 mL of 10% aq. citric acid solution. Similarly, the organic layer was washed with 10 mL of saturated aq. NaHCO<sub>3</sub> (2 times) and 20 mL of Brine. The organic layer was dried over Na<sub>2</sub>SO<sub>4</sub> and concentrated in vacuo to give a white solid (**S1**). This was treated with 4 M HCl in dioxane (5 mL) for 30 min followed by concentration in vacuo to provide HCl salt of **S2** as a white solid (700 mg). This material was carried forward without purification. In a dry 50 mL RBF equipped with stir bar were added 192.0 mg (0.77 mmol, 1.0 equiv.) of **S2**, 200.0 mg (0.77 mmol, 1.0 equiv) of Boc-Asn(Me)<sub>2</sub>-OH, 162.0 mg (0.85 mmol, 1.1 equiv) of EDCI•HCl and 130.0 mg (0.85 mmol, 1.1 equiv) of HOBT•H<sub>2</sub>O. To this 5 mL of DCM was added and reaction mixture was stir for *ca.* 10 min. At this point, 174  $\mu\text{L}$  (1.00 mmol, 1.3 equiv) of DIPEA was added. The reaction mixture was allowed to stir overnight at room temperature and the reaction progress was monitored using LCMS. Upon complete conversion of starting material, 10 mL of 10% aq. citric acid solution was added and reaction was stir for 5 min. The reaction mixture was transfer to separating funnel and was diluted with 50 mL of EtOAc. The aqueous layer was removed and organic layer was washed again with 10 mL of 10% aq. citric acid solution, 10 mL of saturated aq. NaHCO<sub>3</sub> (2 times) and 20 mL of Brine. The organic layer was dried over Na<sub>2</sub>SO<sub>4</sub> and was concentrated in vacuo to give colorless oil. The crude mixture was purified by Biotage® using water and acetonitrile as eluents to give 320.0 mg of **S3** (84% Yield). Compound **S3**, 320.0 mg (0.65 mmol, 1.0 equiv) was dissolved in 10 mL of THF and carefully added to a flask containing 69.0 mg of Pd/C under N<sub>2</sub> atmosphere. The flask was evacuated and refilled with H<sub>2</sub> three times then stirred under H<sub>2</sub> atmosphere by using a H<sub>2</sub> balloon. Upon completion (by LCMS) the reaction mixture was passed through Celite® and was concentrated in vacuo to give peptide **10**.

**Boc-Asn(Me<sub>2</sub>)-DAla-DAla-OH (10):** [ $\alpha$ ]<sub>D</sub><sup>20</sup> +342 (c 3.5, CHCl<sub>3</sub>), <sup>1</sup>H NMR (500 MHz, CDCl<sub>3</sub>):  $\delta$  7.45 (s, 1H), 6.80 (s, 1H), 5.69 (d, *J* = 9.4 Hz, 1H), 4.41 (m, 3H), 3.29 (dd, *J* = 17.1, 3.5 Hz, 1H), 2.91 (s, 3H), 2.79 (s, 3H), 2.52 (dd, *J* = 17.1, 4.1 Hz, 1H), 1.38 (s, 15H). <sup>13</sup>C NMR (125 MHz, CDCl<sub>3</sub>): 174.2, 173.1, 172.8, 171.3, 155.7, 49.7, 48.8, 37.4, 36.3, 35.7, 28.5, 17.4, 17.0. **FT-IR:** 1521, 1635, 1646, 1700, 2934, 2979, 3313. **ESI-HRMS** (M+H<sup>+</sup>): calc. 403.2124, obsrd. 403.1885.

**Boc-Leu-DGln(Me)<sub>2</sub>-DAla-OH (18):** <sup>1</sup>H NMR (500 MHz, CD<sub>3</sub>OD)  $\delta$  4.40 (dd, *J* = 8.0, 5.6 Hz, 1H), 4.34 (q, *J* = 7.3 Hz, 1H), 4.05 - 3.96 (m, 1H), 3.28 (dt, *J* = 3.3, 1.6 Hz, 3H), 3.01 (s, 3H), 2.90 (s, 3H), 2.58 - 2.45 (m, 1H), 2.45 - 2.34 (m, 1H), 2.12 (dt, *J* = 14.1, 7.0 Hz, 1H), 1.89 (dt, *J* = 13.9, 6.9 Hz, 1H), 1.65 (dt, *J* = 13.3, 6.6 Hz, 1H), 1.50 (dd, *J* = 12.0, 6.5 Hz, 2H), 1.41 (s, 12H), 0.93 (d, *J* = 6.6 Hz, 3H), 0.90 (d, *J* = 6.6 Hz, 3H). <sup>13</sup>C NMR (126 MHz, CD<sub>3</sub>OD)  $\delta$  174.35, 174.21, 173.07, 171.82, 156.43, 79.23, 53.61, 52.16, 40.46, 36.28, 34.43, 28.72, 27.30, 24.56, 21.96, 20.56, 16.04. **ESI-HRMS** (M+H<sup>+</sup>): calc. 459.2740, obsrd. 459.1924.

**Table 4.** MIC Determinations for Newly Synthesized Vancomycin Analogs.

| Compounds             | S. aureus<br>(standard)                                             | S. aureus<br>(MRSA)                                                     | E. faecalis<br>(standard)                                             | E. faecalis<br>(VRE, VanB)                                            | E. faecalis<br>(VRE, VanA)                         |
|-----------------------|---------------------------------------------------------------------|-------------------------------------------------------------------------|-----------------------------------------------------------------------|-----------------------------------------------------------------------|----------------------------------------------------|
|                       | <i>S. aureus</i><br>ATCC <sup>1</sup> 29213<br>MMX <sup>2</sup> 100 | <i>S. aureus</i><br>ATCC <sup>1</sup><br>43300<br>MMX <sup>2</sup> 2002 | <i>E. faecalis</i><br>ATCC <sup>1</sup> 29212<br>MMX <sup>2</sup> 101 | <i>E. faecalis</i><br>ATCC <sup>1</sup> 51299<br>MMX <sup>2</sup> 202 | <i>E. faecalis</i><br>VanA<br>MMX <sup>2</sup> 486 |
| <b>6</b>              | 2, 2                                                                | 4, 2                                                                    | 4, 4                                                                  | 64, 64                                                                | >64, >64                                           |
| <b>5</b>              | 4, 4                                                                | 4, 4                                                                    | 8, 8                                                                  | >64, >64                                                              | >64, >64                                           |
| <b>8</b>              | 4, 4                                                                | 8, 4                                                                    | 2, 4                                                                  | >64, >64                                                              | >64, >64                                           |
| <b>17</b>             | 4, 4                                                                | 8, 8                                                                    | 2, 4                                                                  | 64, 64                                                                | >64, >64                                           |
| <i>Vancomycin (4)</i> | 0.5, 0.5                                                            | 1, 1                                                                    | 2, 2                                                                  | 16, 16                                                                | >64, >64                                           |

MSSA: methicillin-susceptible *S. aureus*, MRSA: methicillin-resistant *S. aureus*, VanS: vancomycin-susceptible, VanB: VanB resistance genotype/phenotype, VanA: VanA resistance genotype/phenotype

<sup>1</sup>American Type Culture Collection

<sup>2</sup>Micromyx Isolate Number

<sup>3</sup>CLSI acceptable limits for QC organisms (*S. aureus* ATCC 29213 and *E. faecalis* ATCC 29212) are shown in parentheses where applicable

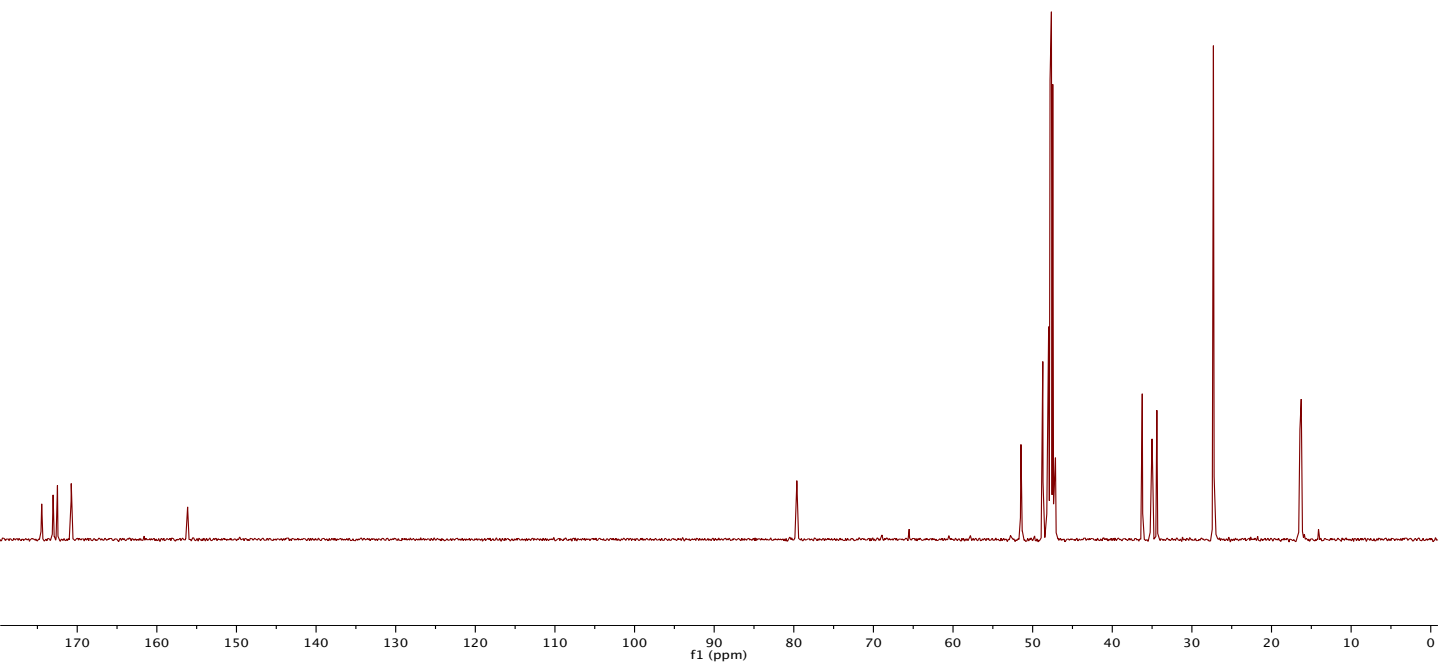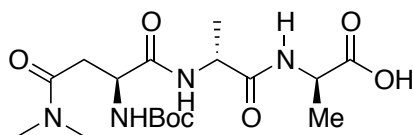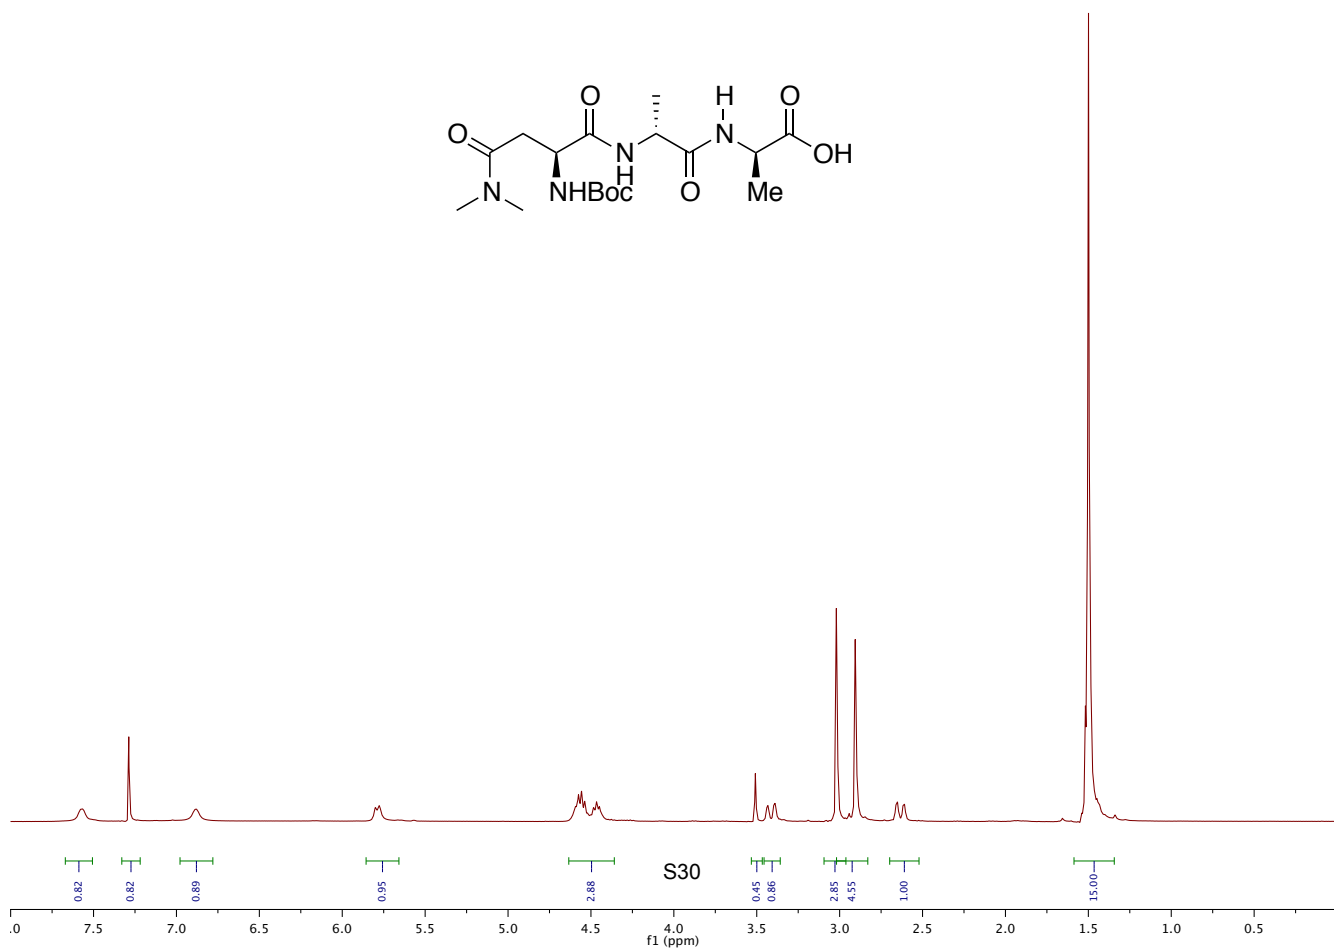

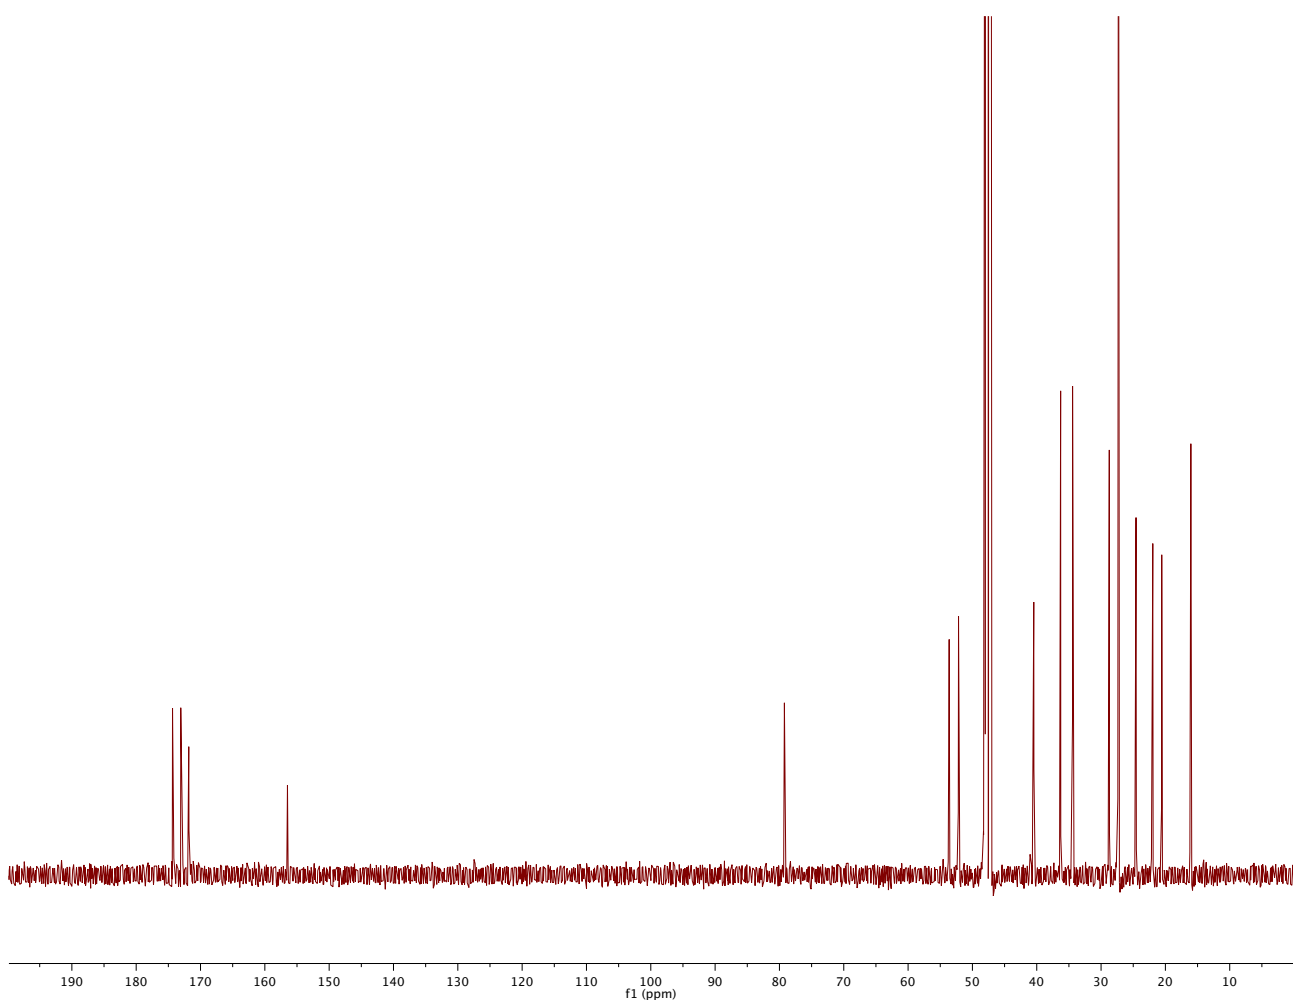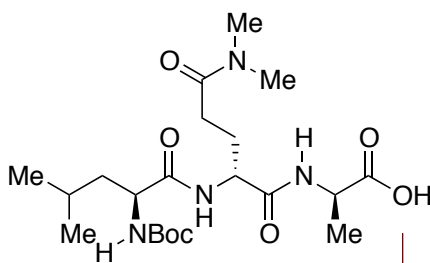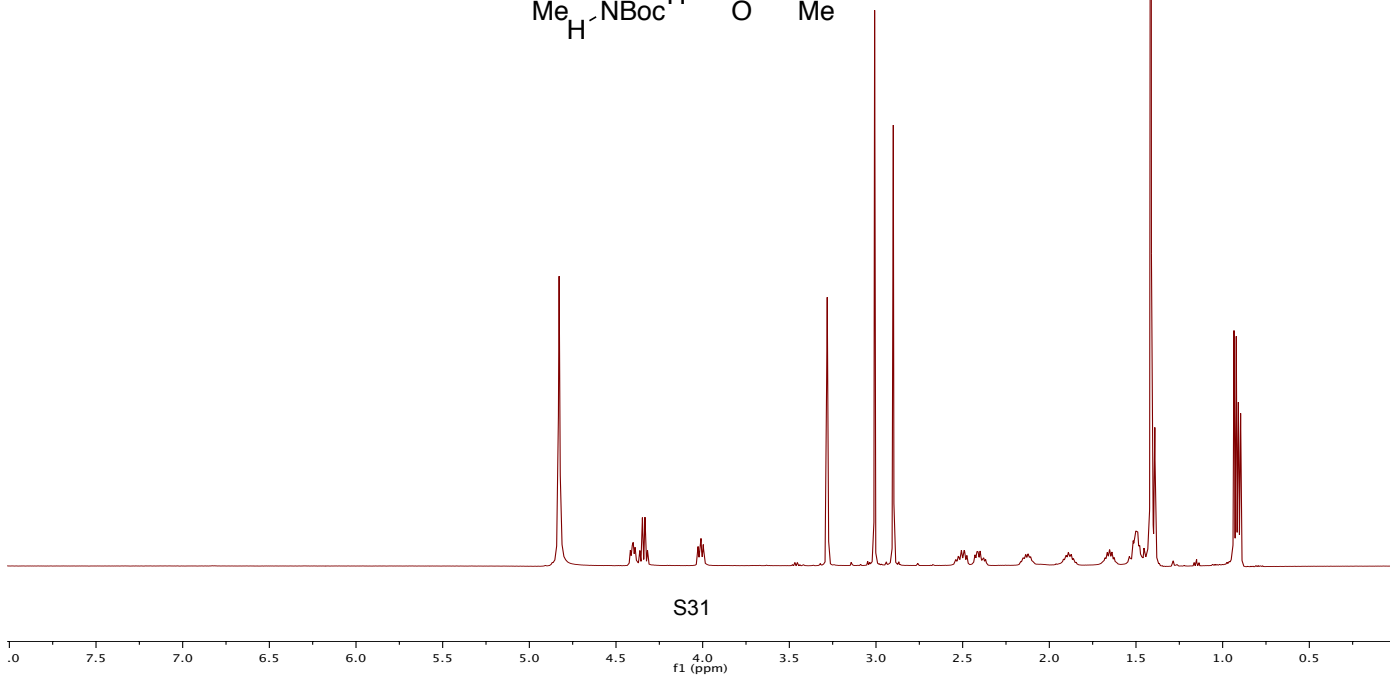

S31

## Synthesis of Vancomycin Methyl Ester:

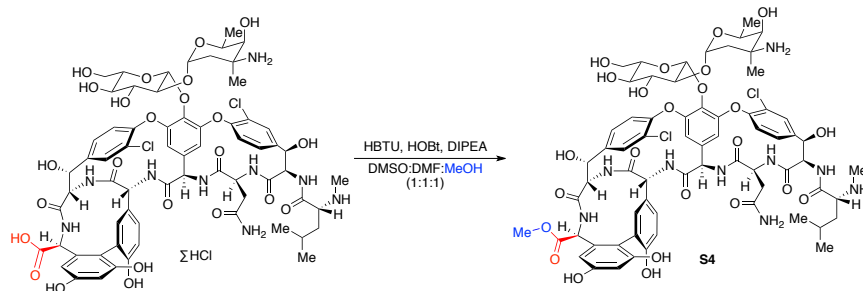

Procedure is adapted from; Sundram, U. N.; Griffin, J. H. *J. Org. Chem.*, **1995**, 60, 1102.

To a round bottom flask equipped with a stir bar were added 200.0 mg (0.134 mmol, 1.0 equiv) of vancomycin•HCl, 80.0 mg (0.206 mmol, 1.5 equiv) of HBTU and 29.0 mg (0.206 mmol, 1.5 equiv) of HOBt. DMSO (2.0 mL), DMF (2.0 mL) and MeOH (2.0 mL) were added to the reaction flask. The reaction mixture was allowed to stir for ca. 5 min after which 65.0  $\mu$ L (0.40 mmol, 3.0 equiv) of DIPEA were added. The reaction mixture was stirred at room temperature for 5 h (during the reaction the solution became clear and turned pale yellow). To the reaction vessel, 10 mL of H<sub>2</sub>O was added and the reaction was stirred for an additional 15 min. Then, MeOH was removed *in vacuo* and the reaction mixture was analyzed by reverse phase HPLC and was purified by preparative reverse phase HPLC to give 32 mg of **S4**.

**HPLC Method for preparative purification:** Symmetry prep C8 7 $\mu$ m (19 X 300 mm) column, 24 mL/min, starts at 5% MeCN (0.1% HCOOH) : 95% H<sub>2</sub>O (0.1% HCOOH) for 3 min, 5 to 8.5% MeCN over 15 min, 8.5 to 50% MeCN over 3 min, 50 to 95% MeCN over 3 min hold at 95% MeCN for 3 min, 95% to 5% over 3 min.

**Analytical method:** Symmetry prep C8 7 $\mu$ m column, 4 mL/min, starts at 5% MeCN (0.1% HCOOH) : 95% H<sub>2</sub>O (0.1% HCOOH) for 3 min, 5 to 8.5% MeCN over 15 min, 8.5 to 50% MeCN over 3 min, 50 to 95% MeCN over 3 min hold at 95% MeCN for 3 min, 95% to 5% over 3 min. Retention time for desired product is 18.6 min.

The <sup>1</sup>H-NMR of the product was compared to the tabulated <sup>1</sup>H NMR data reported in the study of Nicolaou. Nicolaou, K. C.; Mitchell, H. J.; Jain, N. F.; Bando, T.; Hughes, R.; Winsinger, N.; Natarajan, S.; Koumbis, A. E. *Chem. Eur. J.* **1999**, 5, 2648.

In addition, we performed additional NMR experiments to assess the assignment. See below for raw proton, NOESY, HSQC data.

## HPLC Trace:

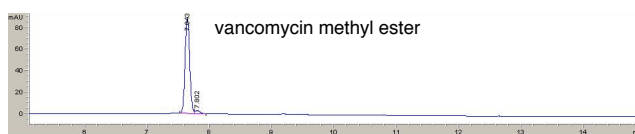



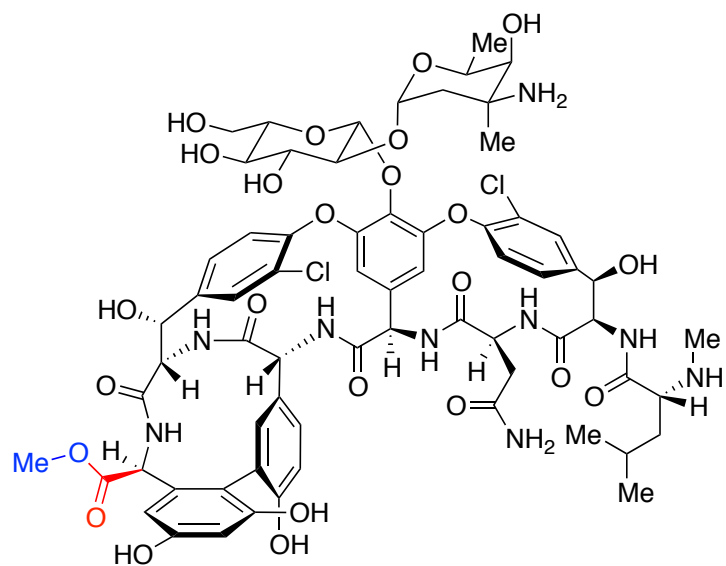

<sup>1</sup>H-NMR at 25 °C

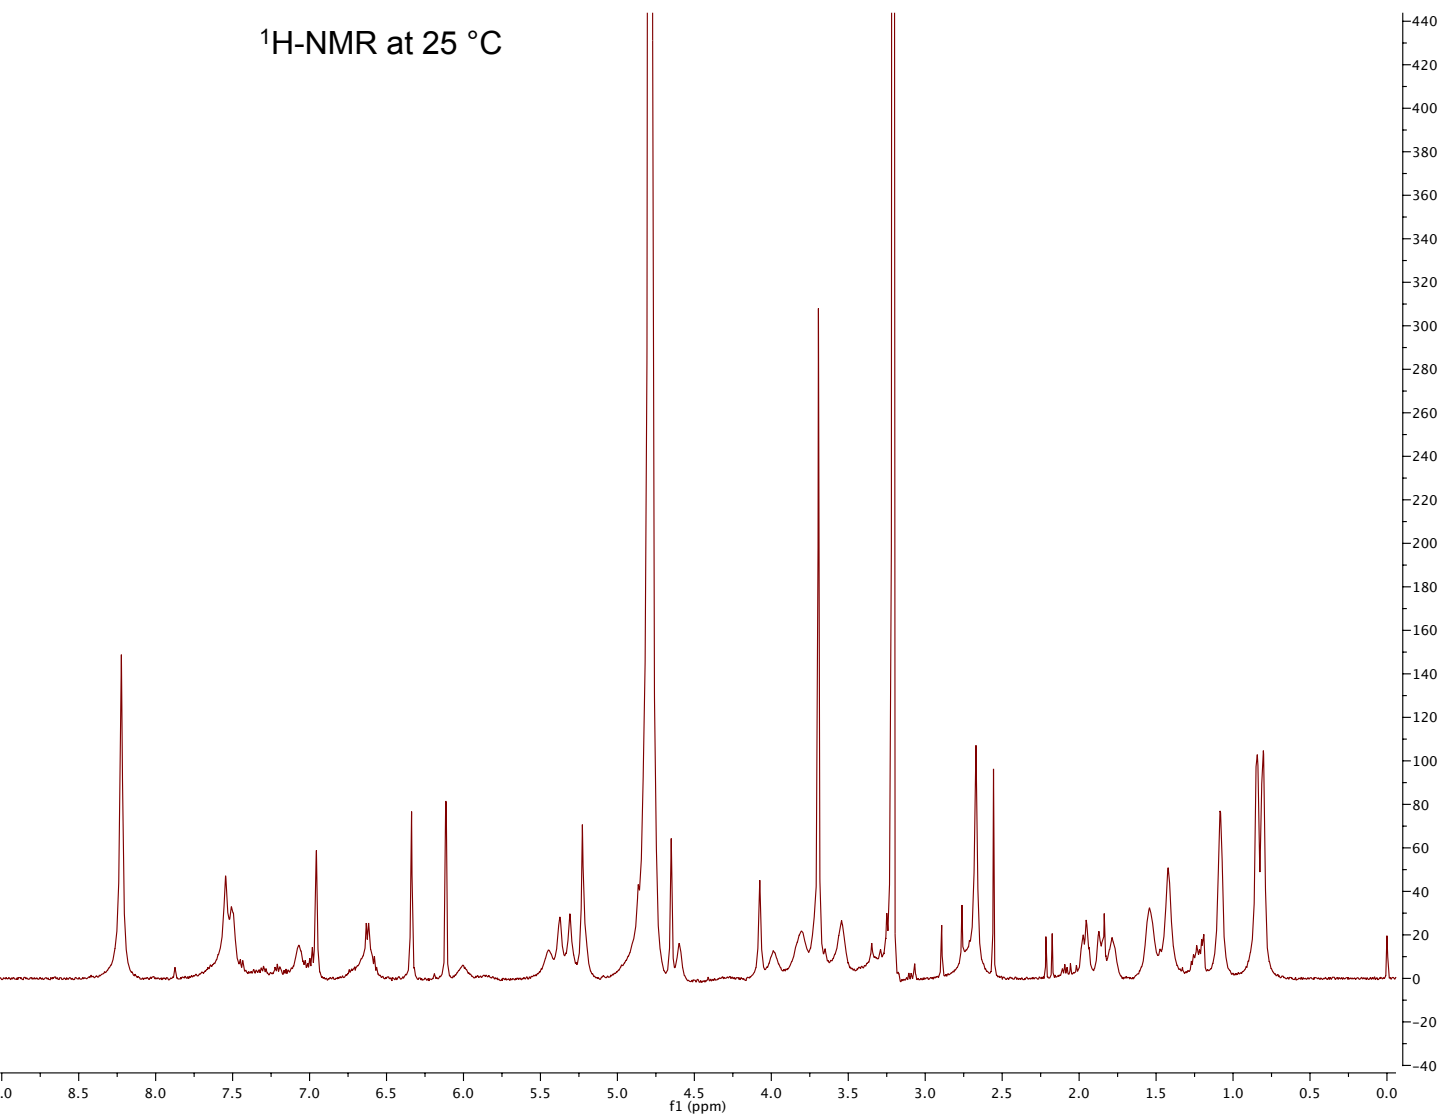

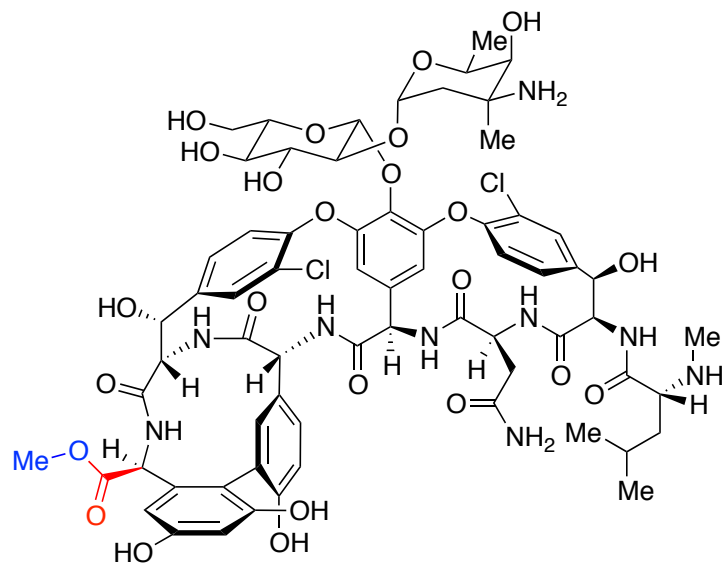

<sup>1</sup>H-NMR at 57 °C

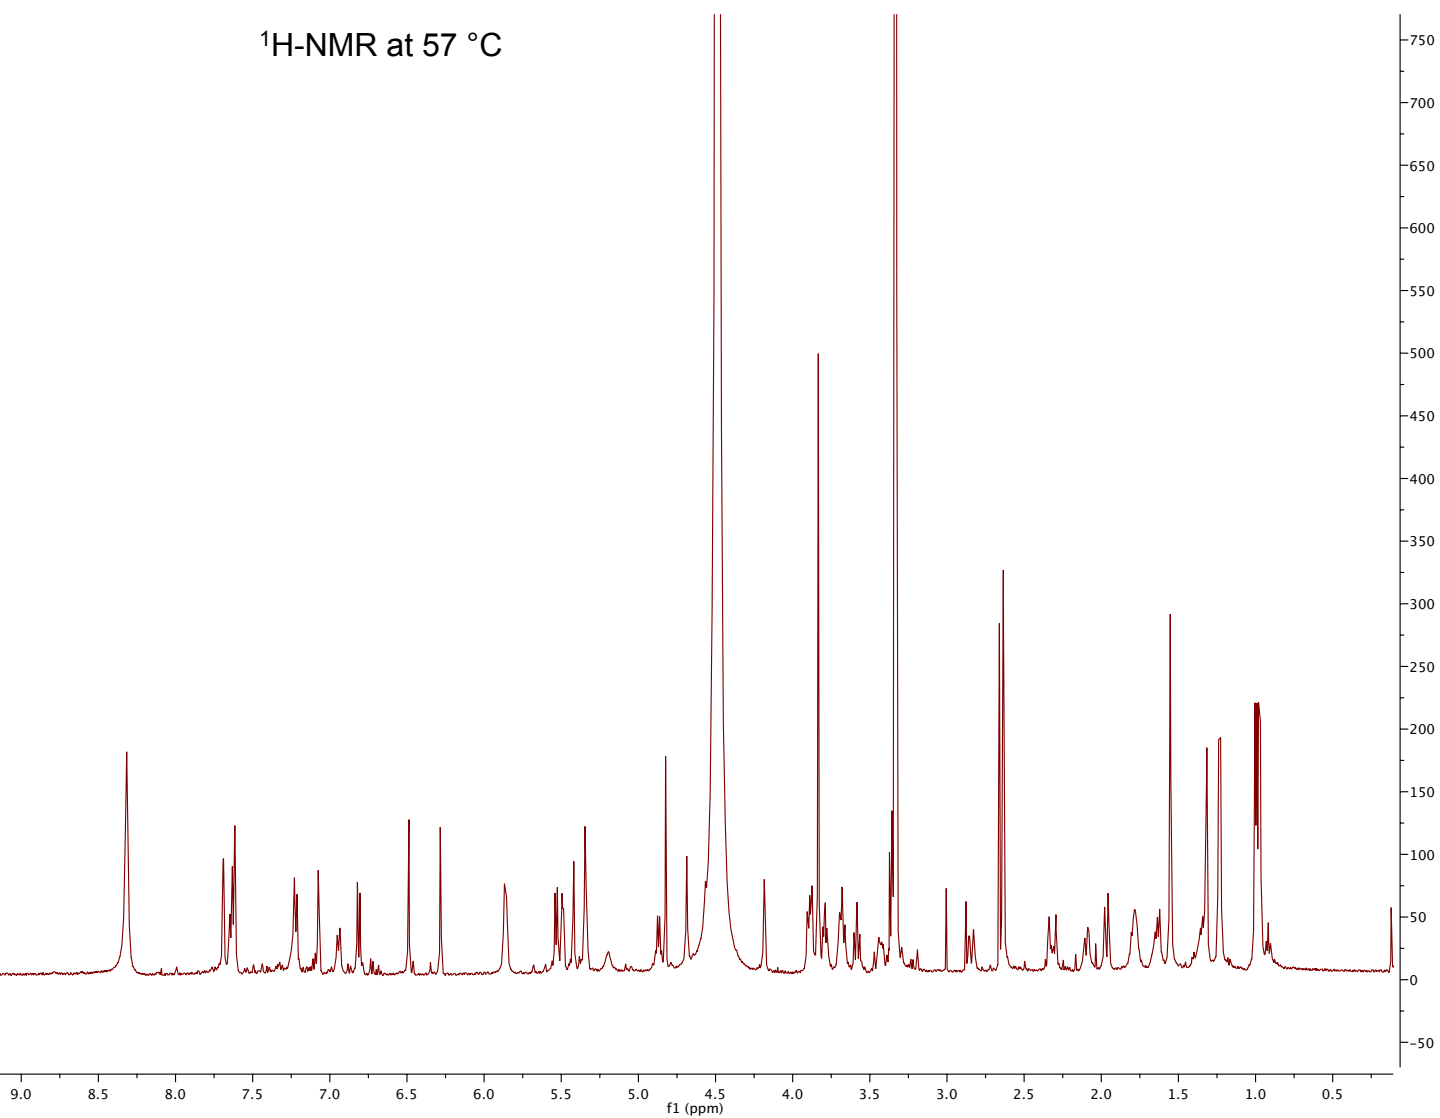

NOESY, CD<sub>3</sub>OD  
at 25 °C

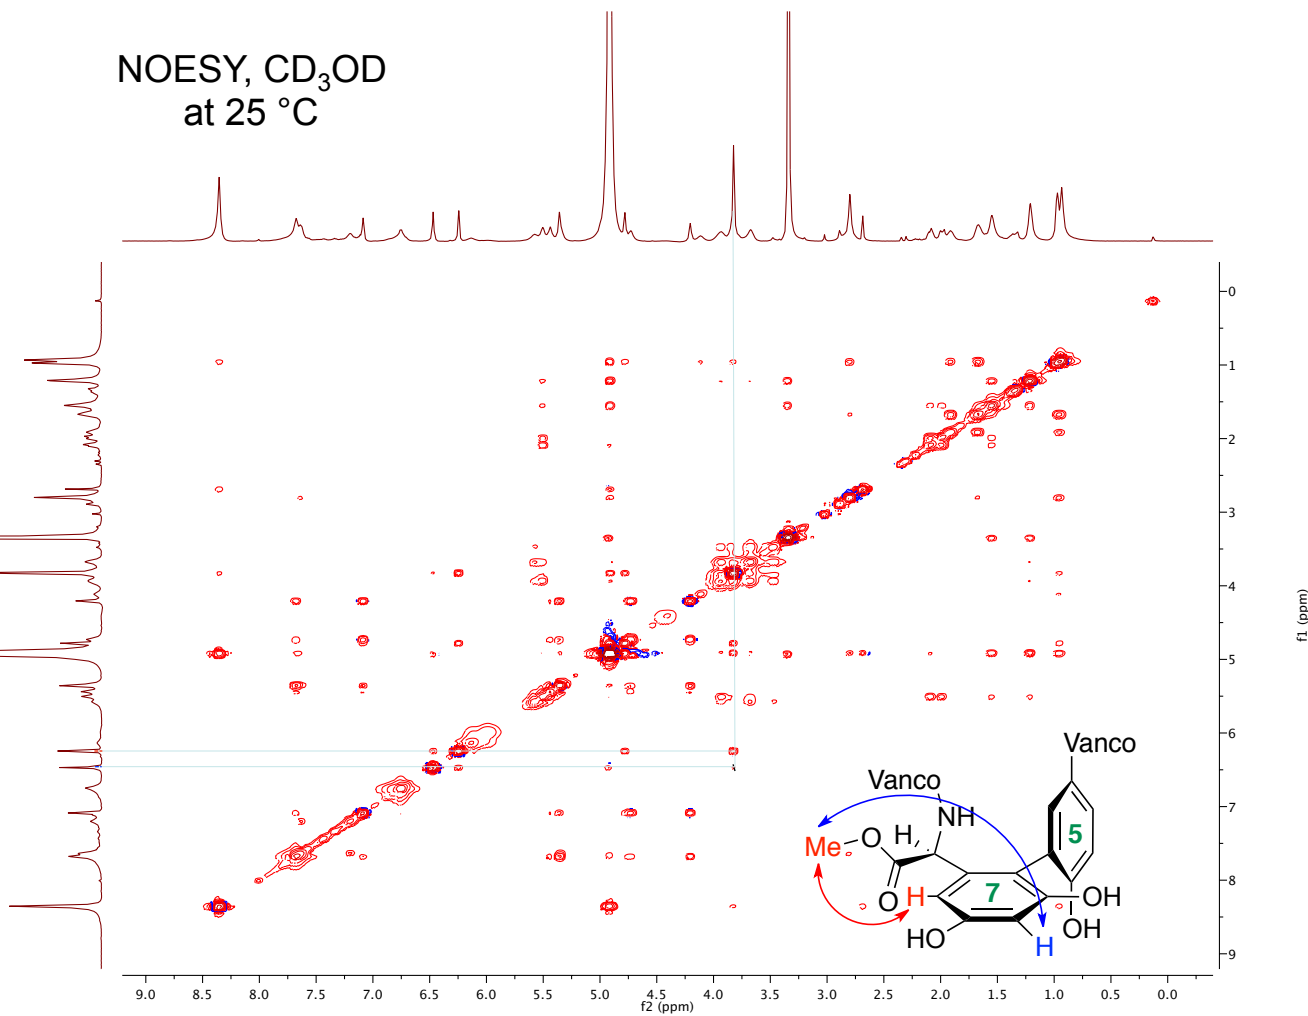

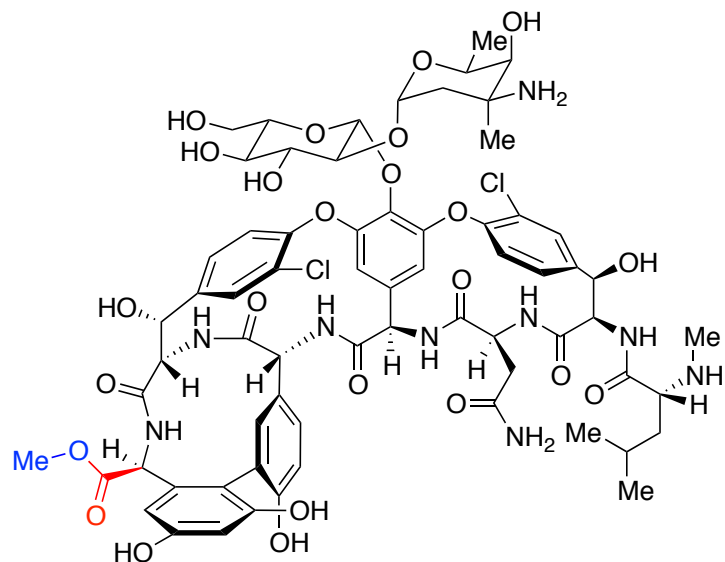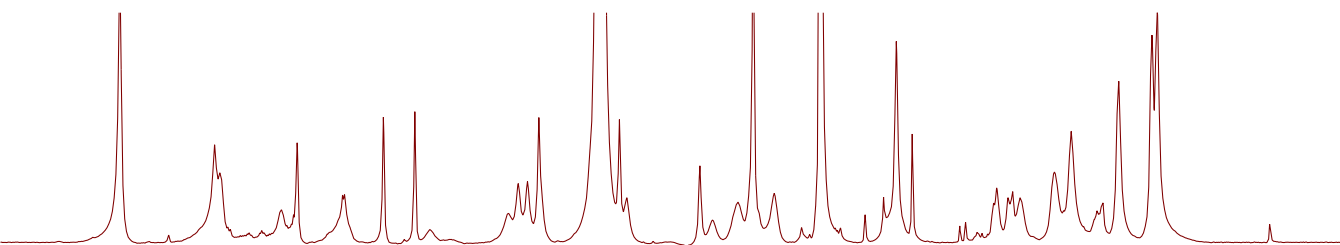

HSQC, CD<sub>3</sub>OD  
at 25 °C

Red = CH, CH<sub>3</sub>  
Blue = CH<sub>2</sub>

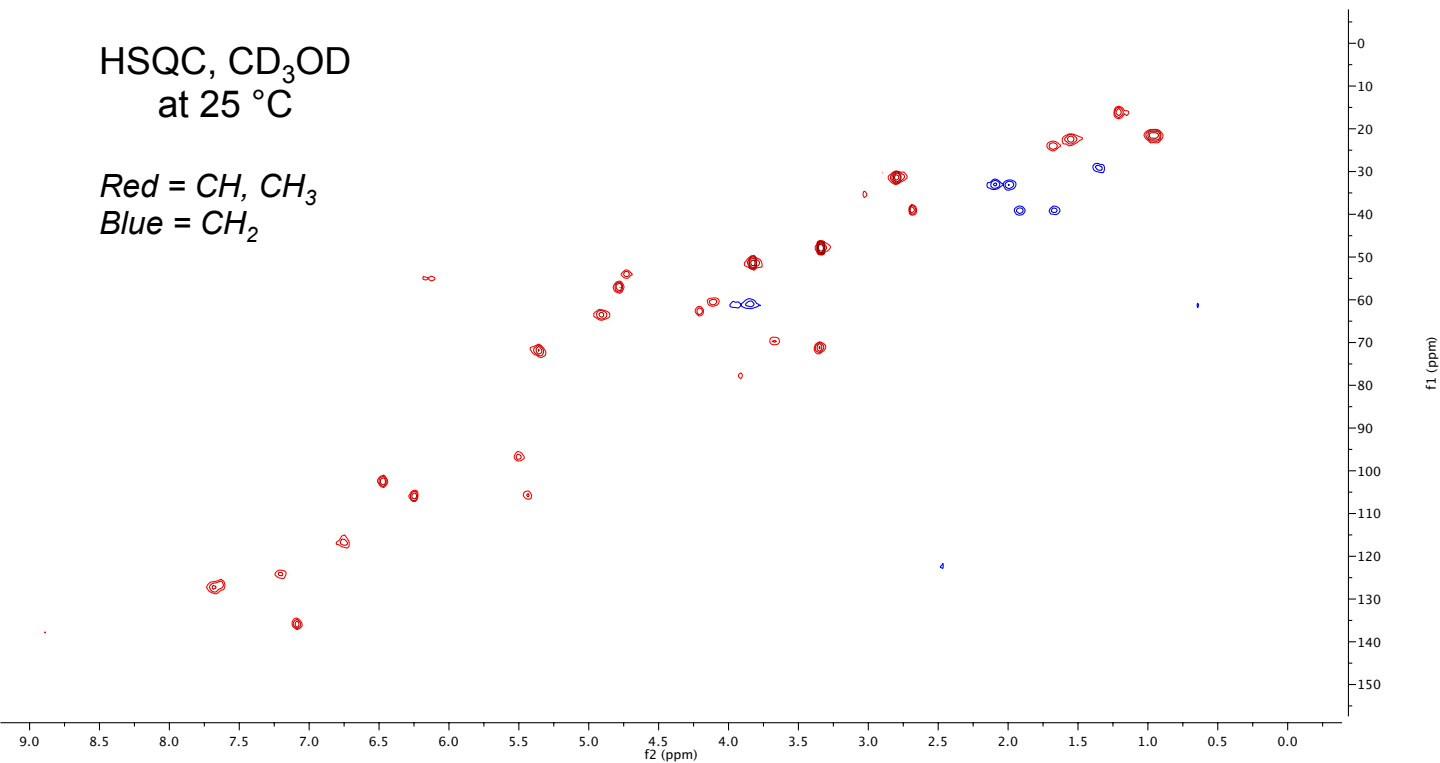

## Bromination of Vancomycin Methyl Ester (S4):

*Control:* To a 2.5 dram vial equipped with a stir bar were added 12.0 mg (0.008 mmol, 1.0 equiv) of vancomycin methyl ester (**S4**). MeOH (2 mL) was added to the reaction flask. The reaction mixture was allowed to stir for ca. 5 min, when 7.3 mg (0.032 mmol, 4.0 equiv) of NBP was added. Aliquots were collected at regular time intervals and analyzed by reverse phase HPLC.

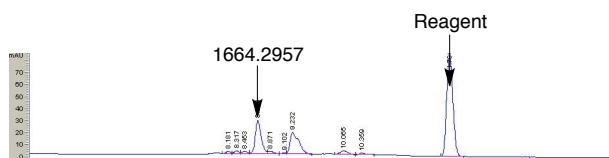

*With Guanidine•HCl:* To a 2.5 dram vial equipped with a stir bar were added 12.0 mg (0.008 mmol, 1.0 equiv) of vancomycin methyl ester (**S4**), 13.6 mg of guanidine•HCl (18.0 equiv) and MeOH (2 mL). The reaction mixture was allowed to stir for ca. 5 min, after which 7.3 mg (0.032 mmol, 4.0 equiv) of NBP was added. Aliquots were collected at regular time intervals and analyzed by reverse phase HPLC.

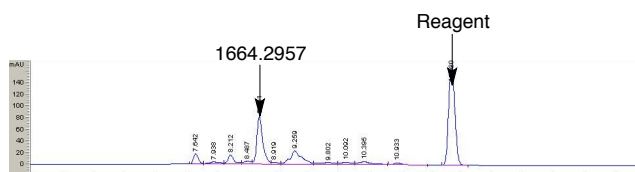

The HRMS and HPLC analysis of both reactions revealed that major product formed in both reactions has a mass of 1664.2957 ( $M+H^+$ ). The identity of this material is not assigned; however, the isotope pattern of mass spectrum is consistent with that of a dibromide containing a vancomycin methyl ester analogue with molecular formula of  $C_{69}H_{81}Br_2Cl_2N_9O_{25}$ . These experiments did not deliver ready access to monobromides analogous to **7<sub>f</sub>-Br** over **7<sub>d</sub>-Br**, as their corresponding methyl esters.

Other additives that might target carboxylic acid functionality, such as ureas, also provide some selectivity for **7<sub>f</sub>-Br** over **7<sub>d</sub>-Br** upon reaction with vancomycin (**4**). The raw data for these promoters are presented below.

*Reaction Conditions:* 0.008 mmol of **4**, 4 equiv of NBP, 3 equiv of urea, 1 mL of MeOH

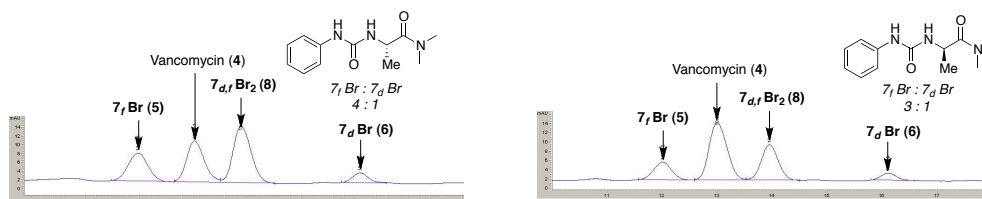

**Table 4.** Optimization of Reaction Conditions Aiming Analog **5** (Manuscript Table 2)

| Entry | Additive            | Solvent                     | NBP (equiv) | t (h) | % conv. | 5<br>7 <sub>f</sub> Br : 7 <sub>d</sub> Br : 8 | 6<br>7 <sub>d</sub> fBr <sub>2</sub> |
|-------|---------------------|-----------------------------|-------------|-------|---------|------------------------------------------------|--------------------------------------|
| 1     | No catalyst         | H <sub>2</sub> O:MeOH (5:1) | 2           | 12    | 71      | 1.0 : 1.0 : 1.3 <sup>b</sup>                   |                                      |
| 2     | No catalyst         | MeOH                        | 2           | 2     | 17      | 1.0 : 1.0 : 3.0 <sup>b</sup>                   |                                      |
| 3     | No catalyst         | MeOH                        | 4           | 1     | 92      | 14.3 : 1.0 : 53.8 <sup>c</sup>                 |                                      |
| 4     | <b>10</b> (2 equiv) | MeOH                        | 4           | 1     | 31      | 0.5 : 1.0 : 1.3 <sup>b</sup>                   |                                      |
| 5     | Guanidine•HCl       | MeOH                        | 4           | 1     | 85      | 12.7 : 1.0 : 10.8 <sup>c</sup>                 |                                      |
| 6     | Guanidine•HCl       | MeOH                        | 4           | 1     | 92      | 11.8 : 1.0 : 11.4 <sup>d</sup>                 |                                      |

a) Ratios were measured by HPLC at 280 nm wavelength. b) 8 μmol of **4**, 6.6 mM. c) 16 μmol of **4**, 3.3 mM, 18 equiv of guanidine•HCl. d) similar to (c) except with 6 equiv of guanidine•HCl.

**General Procedure for Table 4:**

**Entry 1:** To a HPLC vial equipped with a stir bar were added 12.5 mg (0.008 mmol, 1.0 equiv) of vancomycin•HCl. Water (250 μL) and MeOH (50 μL) were added to the reaction flask. The reaction mixture was allowed to stir for ca. 5 min, after which 3.7 mg (0.016 mmol, 2.0 equiv) of NBP were added. Aliquots were collected at regular time intervals and analyzed by reverse phase HPLC.

**Entry 2:** To a HPLC vial equipped with a stir bar were added 12.5 mg (0.008 mmol, 1.0 equiv) of vancomycin•HCl. MeOH (1.2 mL) were added to the reaction flask. The reaction mixture was allowed to stir for ca. 5 min, after which 3.7 mg (0.016 mmol, 2.0 equiv) of NBP were added. Aliquots were collected at regular time intervals and analyzed by reverse phase HPLC.

**Entry 3:** To a HPLC vial equipped with a stir bar were added 25.0 mg (0.016 mmol, 1.0 equiv) of vancomycin•HCl. MeOH (4.0 mL) were added to the reaction flask. The reaction mixture was allowed to stir for ca. 5 min, after which 14.6 mg (0.064 mmol, 4.0 equiv) of NBP were added. Aliquots were collected at regular time intervals and analyzed by reverse phase HPLC.

**Entry 4:** To a HPLC vial equipped with a stir bar were added 25.0 mg (0.016 mmol, 1.0 equiv) of vancomycin•HCl and peptide **10** (2 equiv). MeOH (4.0 mL) were added to the reaction flask. The reaction mixture was allowed to stir for ca. 5 min, after which 14.6 mg (0.064 mmol, 4.0 equiv) of NBP were added. Aliquots were collected at regular time intervals and analyzed by reverse phase HPLC.

**Entry 5:** To a HPLC vial equipped with a stir bar were added 25.0 mg (0.016 mmol, 1.0 equiv) of vancomycin•HCl and guanidine•HCl (18 equiv). MeOH (4.0 mL) were added to the reaction flask. The reaction mixture was allowed to stir for ca. 5 min, after which 14.6 mg (0.064 mmol, 4.0 equiv) of NBP were added. Aliquots were collected at regular time intervals and analyzed by reverse phase HPLC.

**Entry 6:** The same procedure as entry 5 was employed, except 6 equiv of guanidine•HCl was used

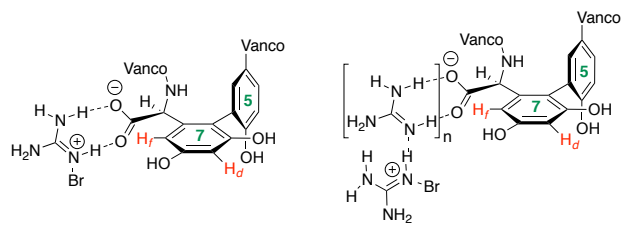

**Figure 8.** Speculative concept for bromide delivery by guanidine.
